# Supplementary material for: Highly enantioselective three-component Povarov reaction catalyzed by SPINOL-phosphoric acids
Source: Royal Society of Chemistry journal article supplement (doi:10.1039/c2ra22796g), 2012-11-08
Supplement: c2ra22796g.pdf [file c2ra22796g.pdf]

# Supporting information

For

## Highly Enantioselective Three-Component Povarov Reaction Catalyzed by SPINOL-Phosphoric Acids

*Dan Huang,<sup>a</sup> Fangxi Xu,<sup>a</sup> Tao Chen,<sup>b</sup> Yanguang Wang,<sup>a</sup> and Xufeng Lin<sup>\*a</sup>*

<sup>a</sup> *Department of Chemistry, Zhejiang University, Hangzhou 310027, P. R of China; E-mail: lxfoke@zju.edu.cn*

<sup>b</sup> *School of Chemistry and Chemical Engineering, Yangzhou University, Yangzhou 225002, Jiangsu, P. R of China.*

### CONTENTS

|                       |     |
|-----------------------|-----|
| 1. NMR spectra.....   | S2  |
| 2. HPLC spectra ..... | S18 |

## 1. NMR spectra for all compounds

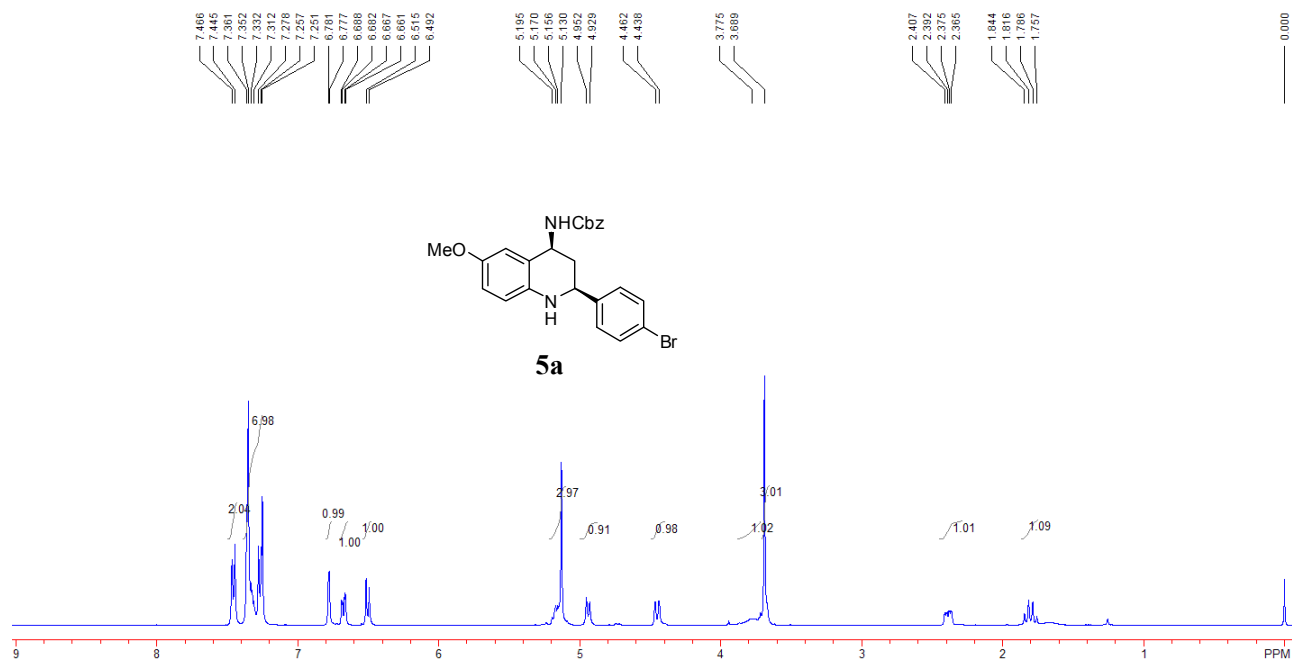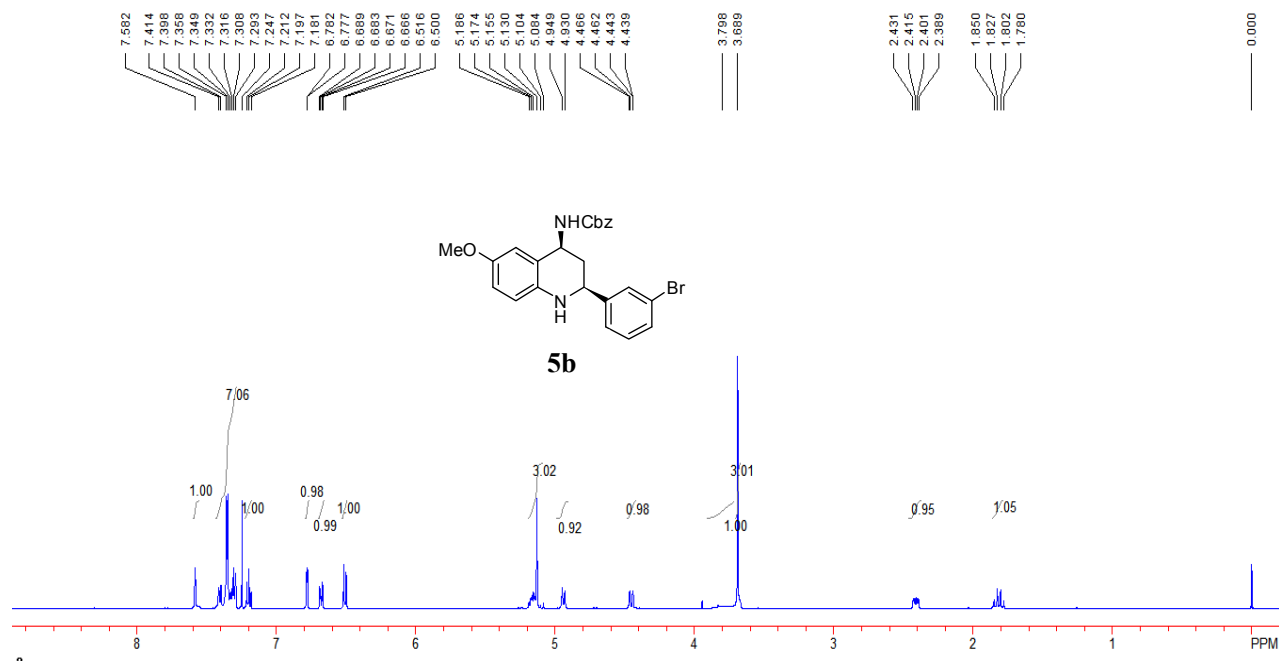

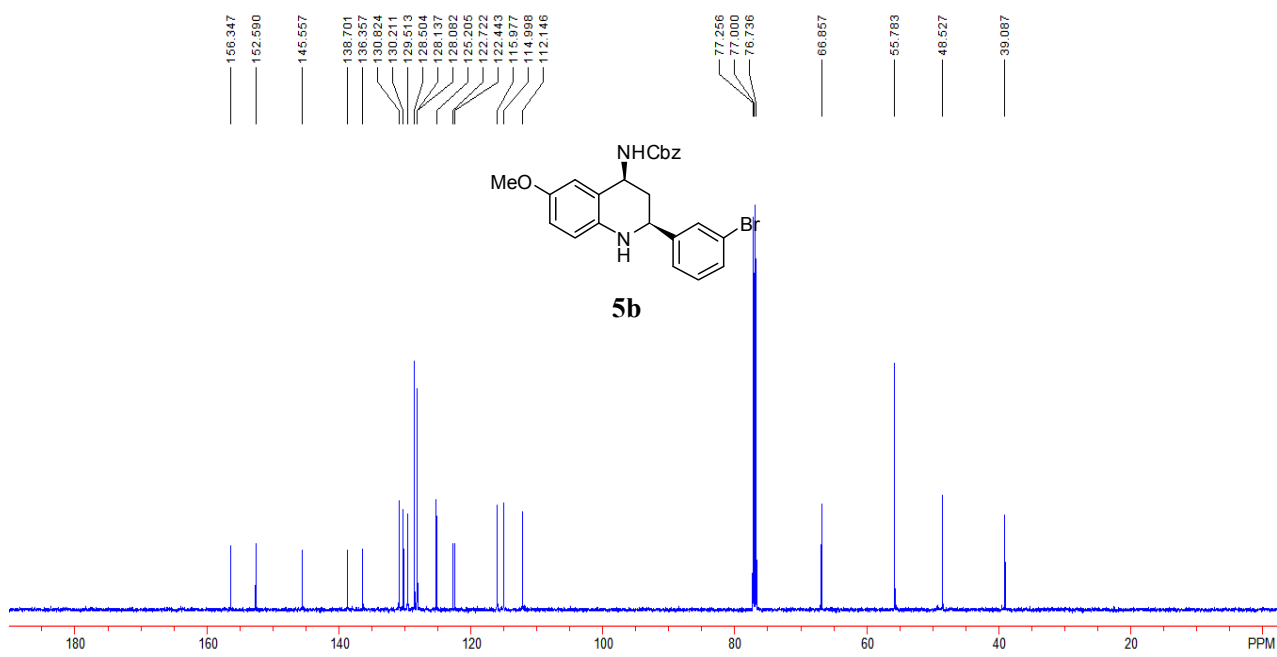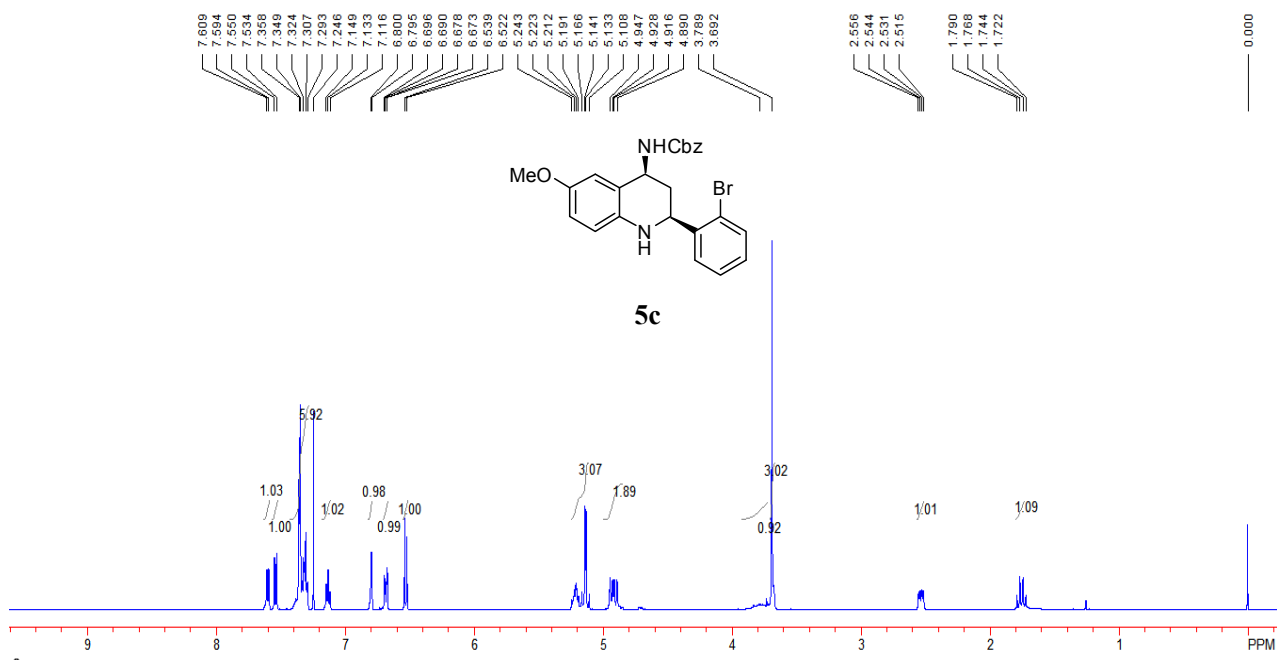

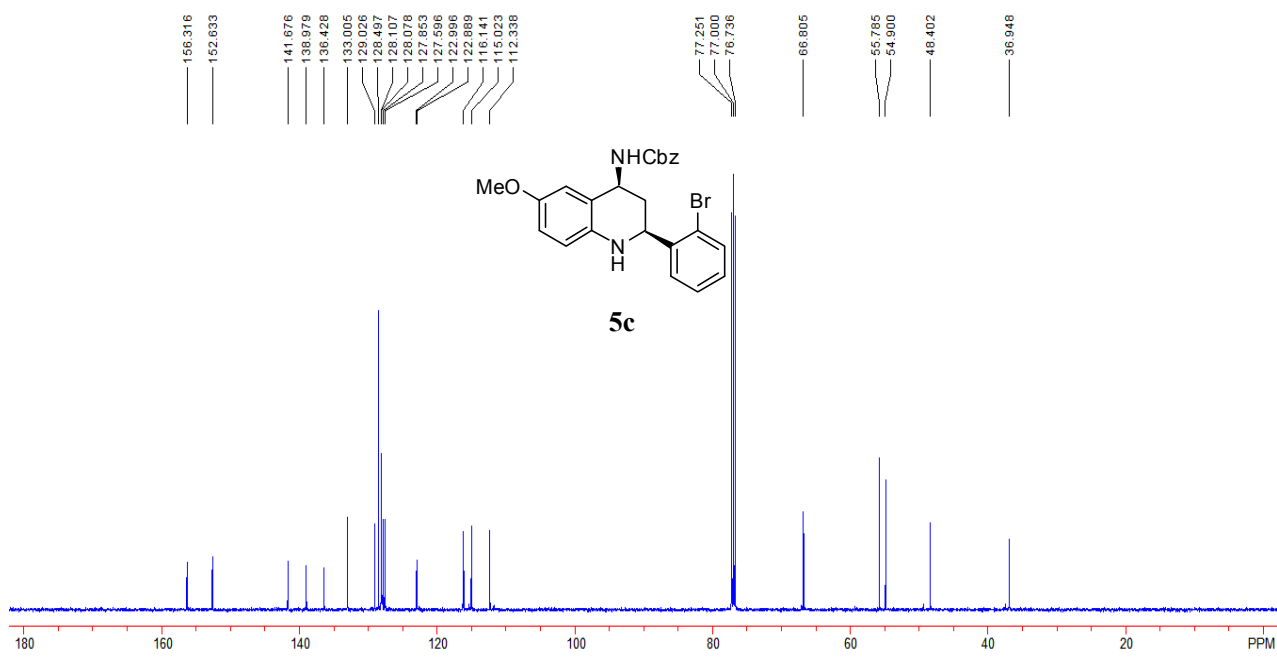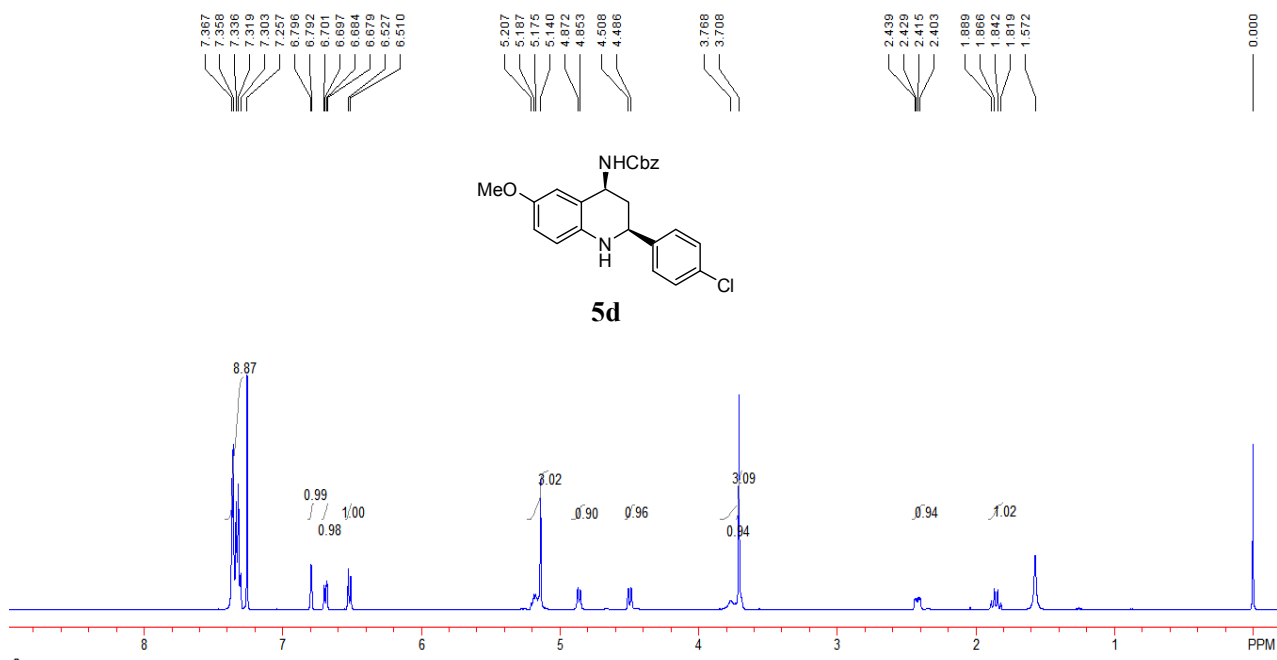

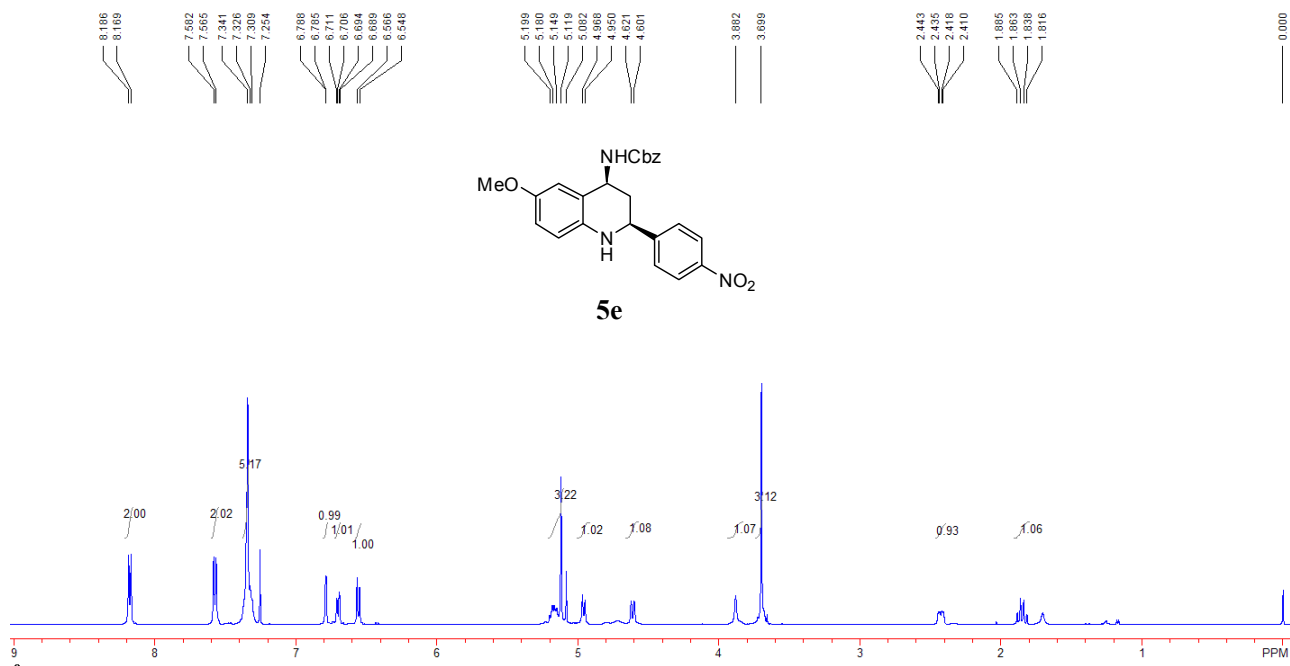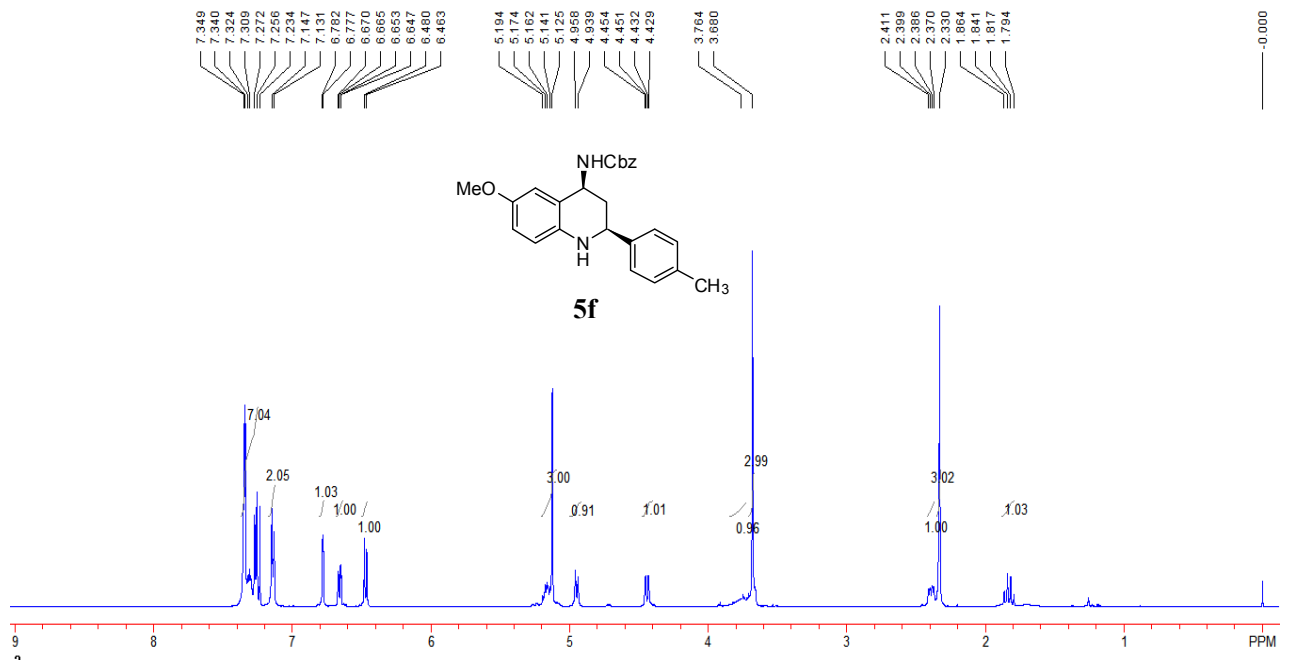

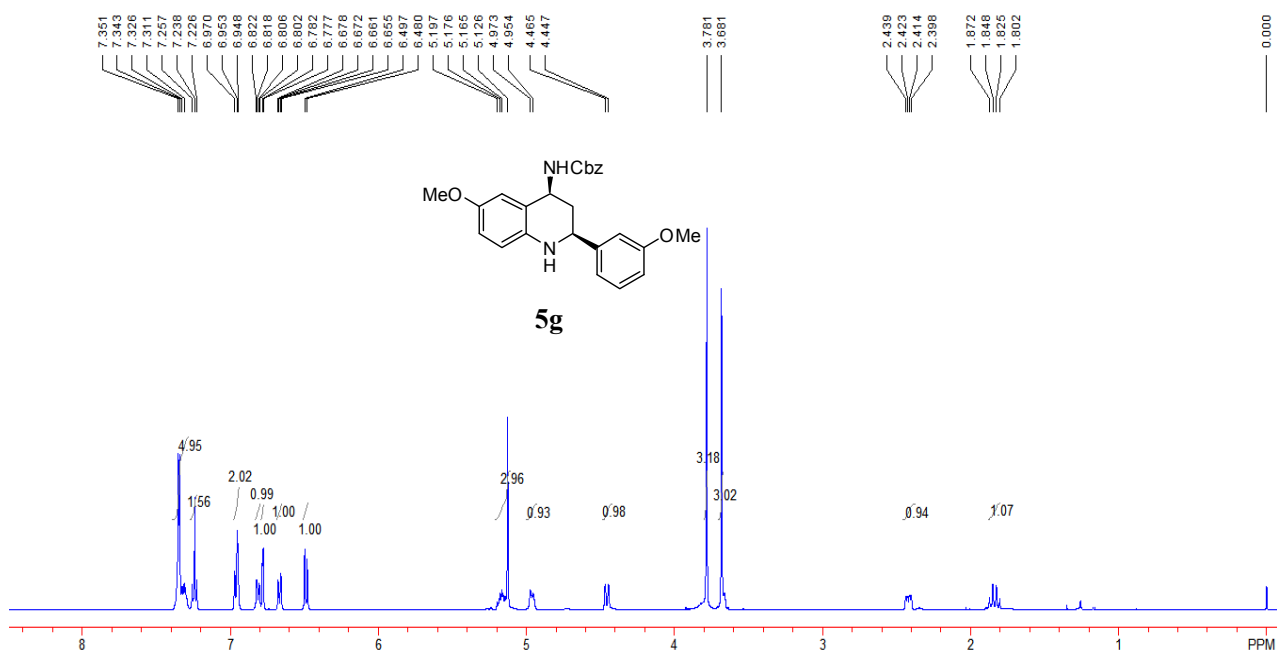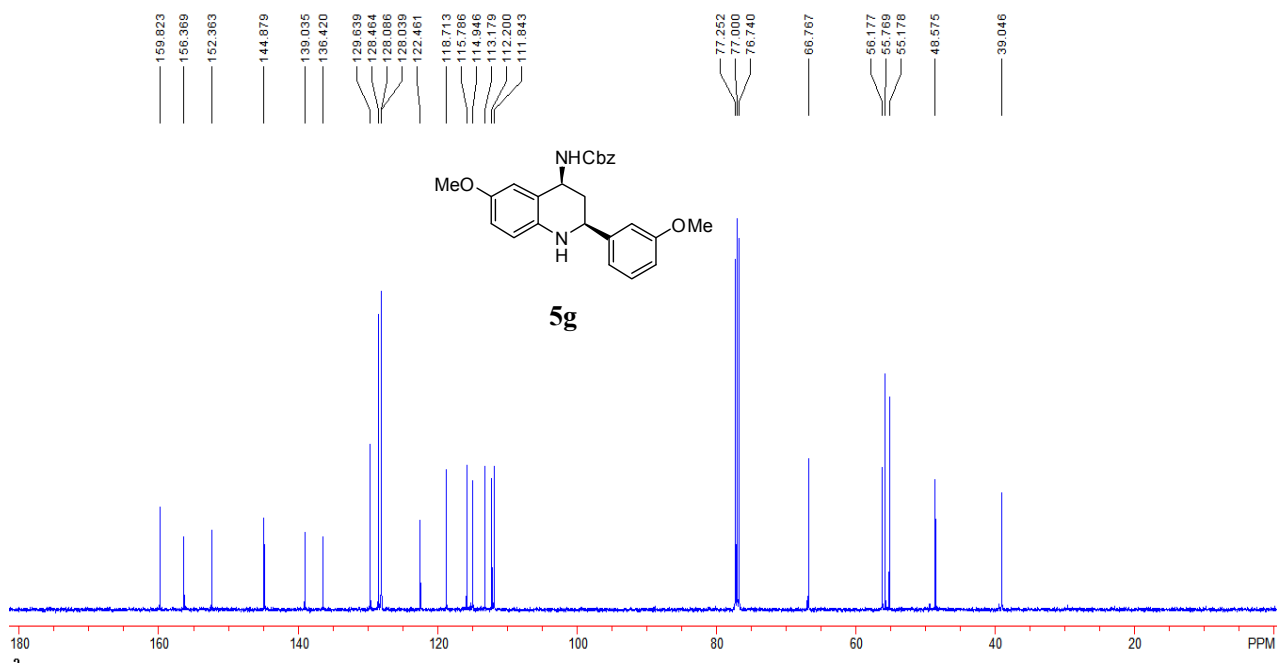

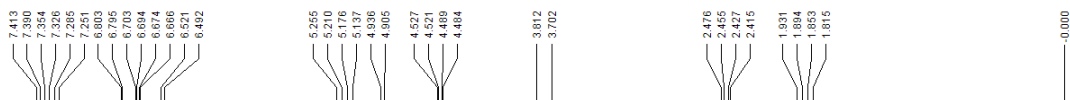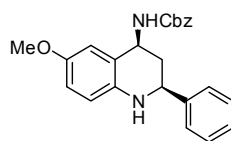

5h

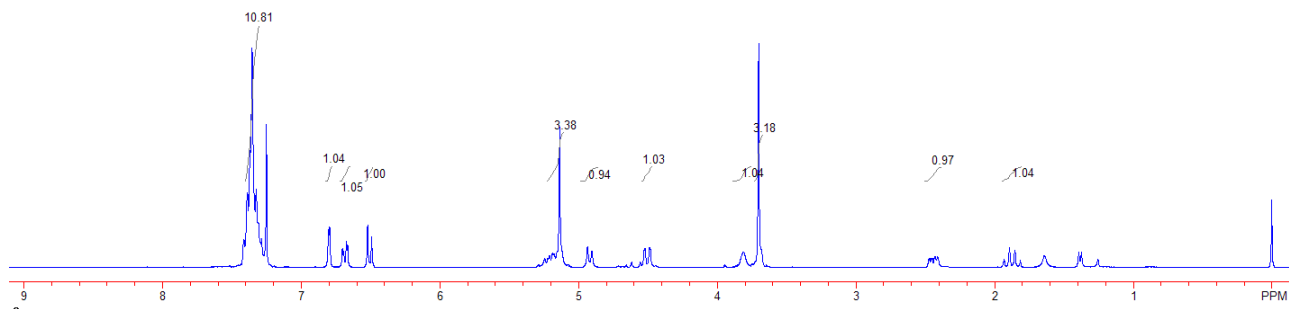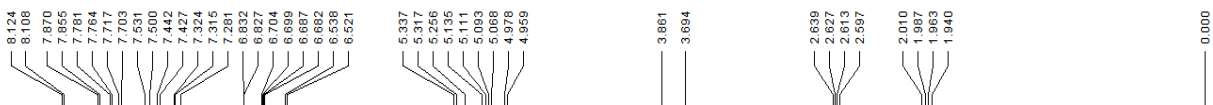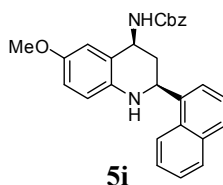

5i

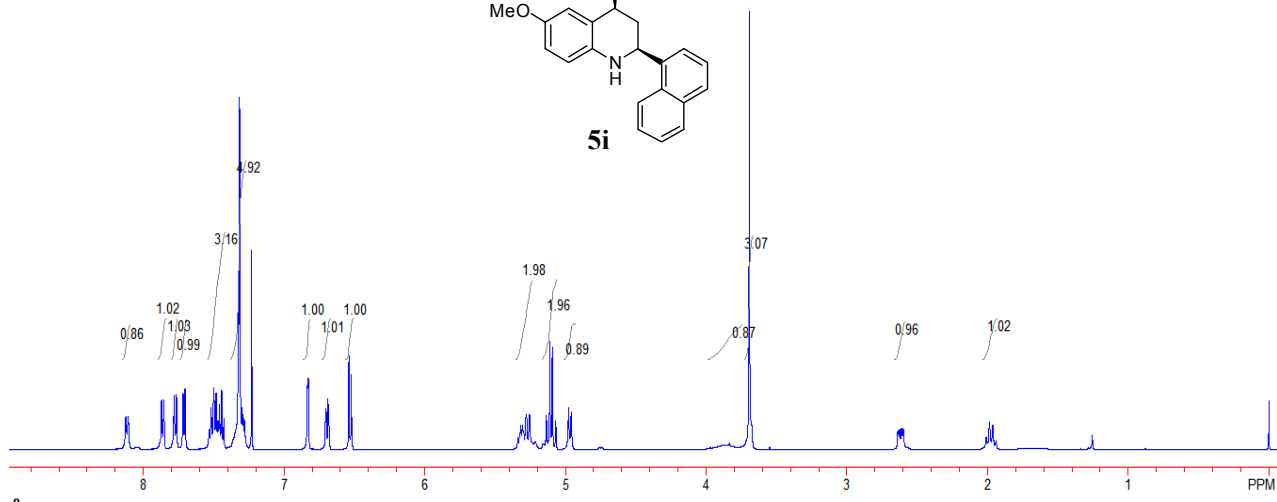

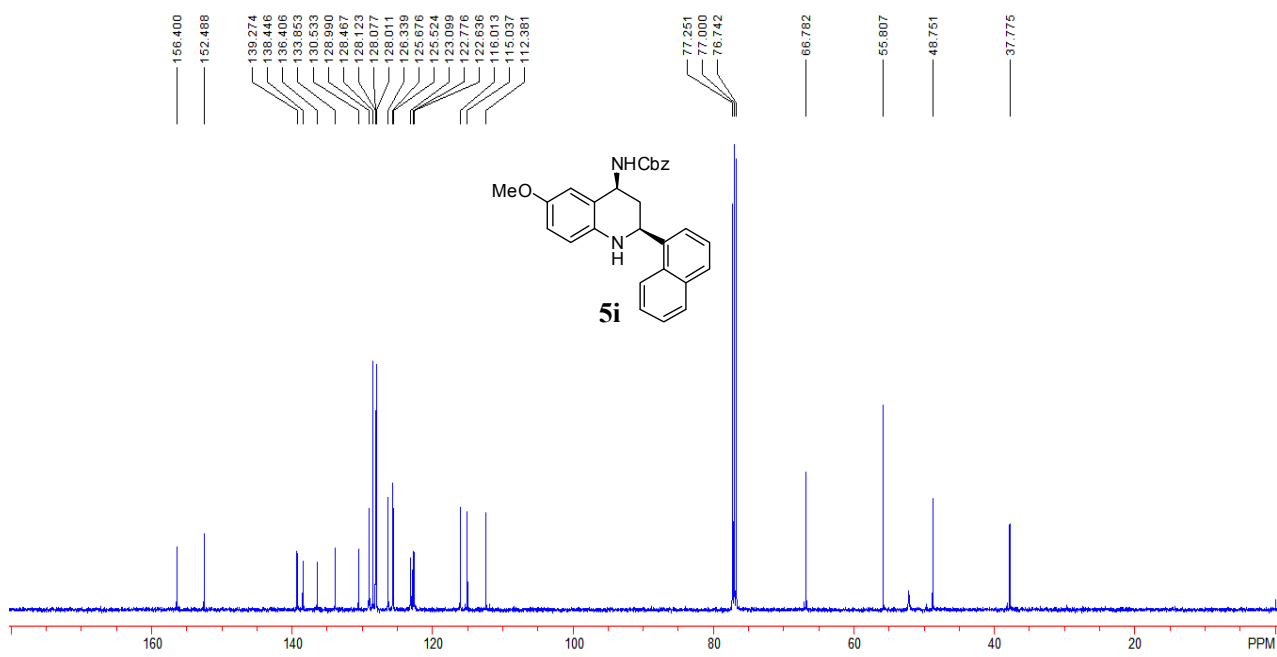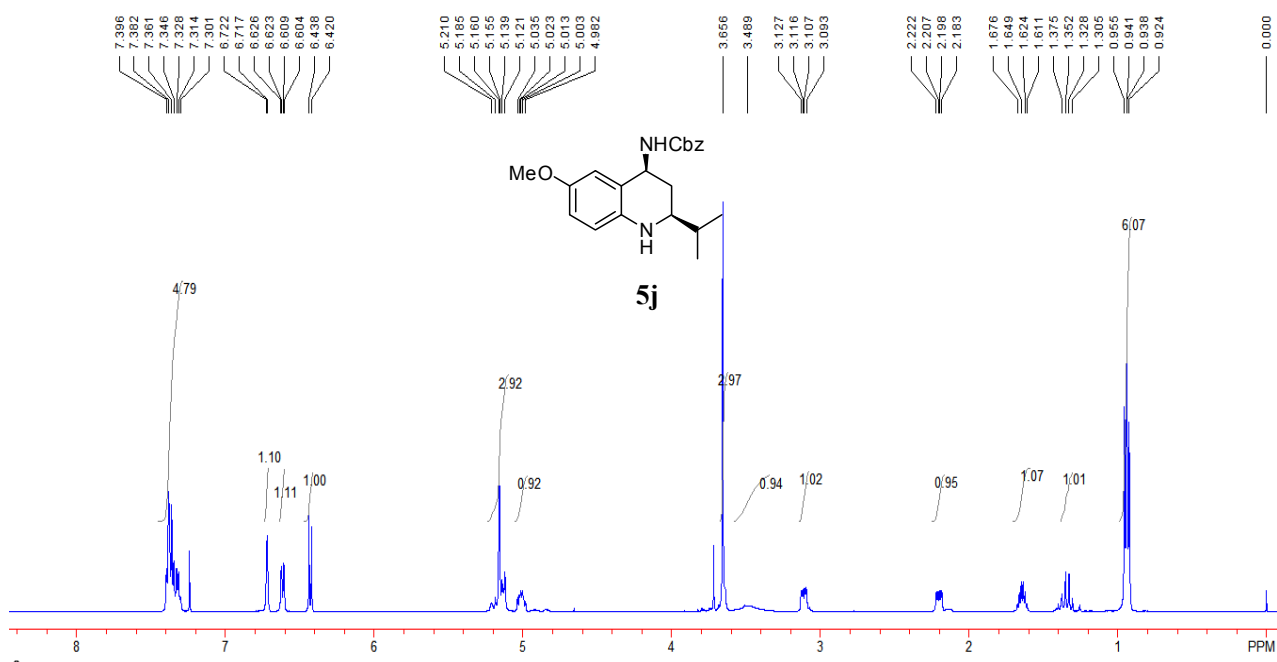



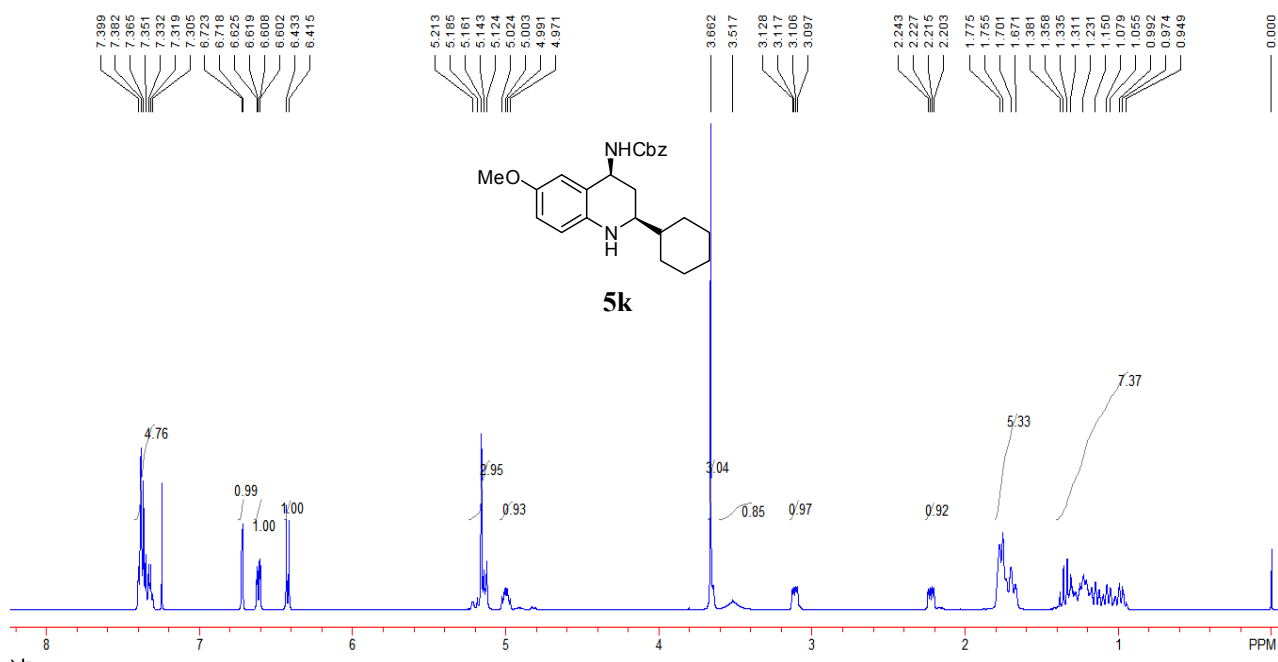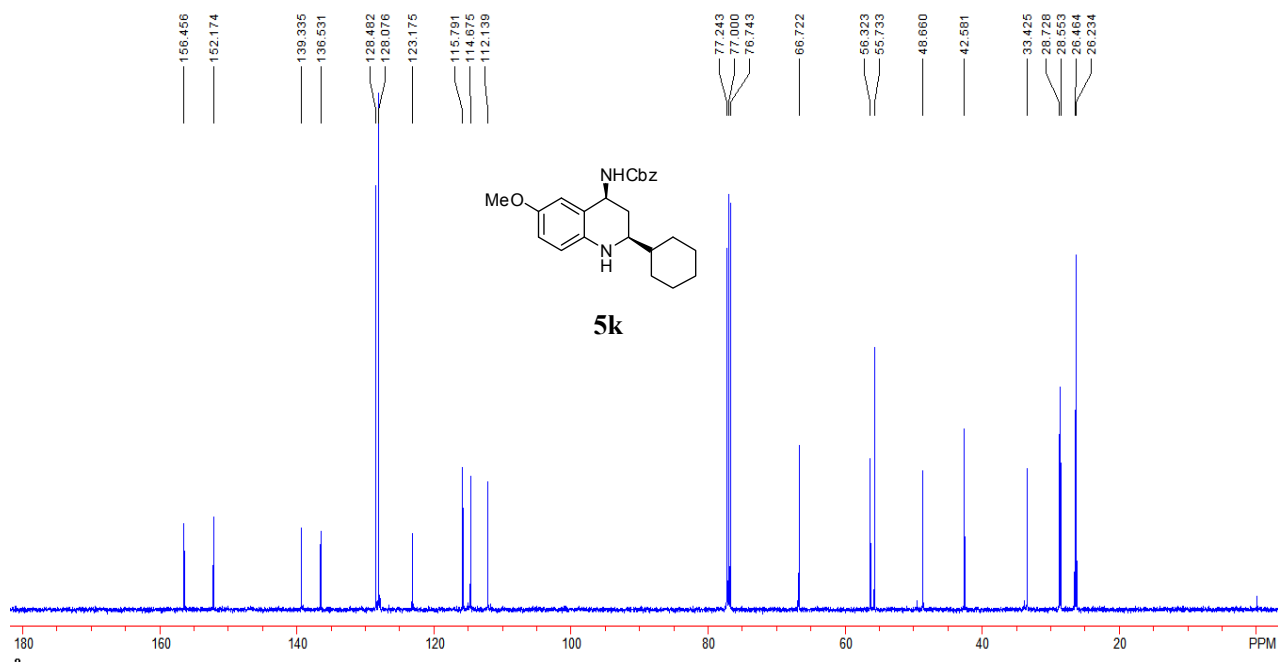

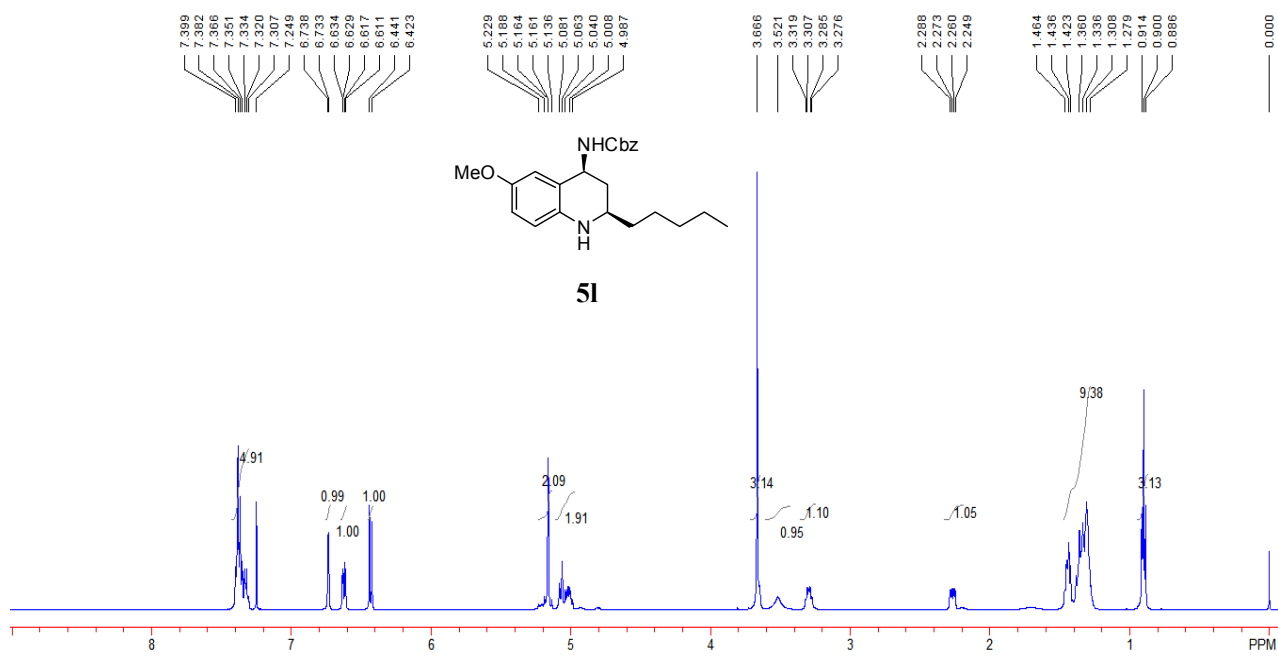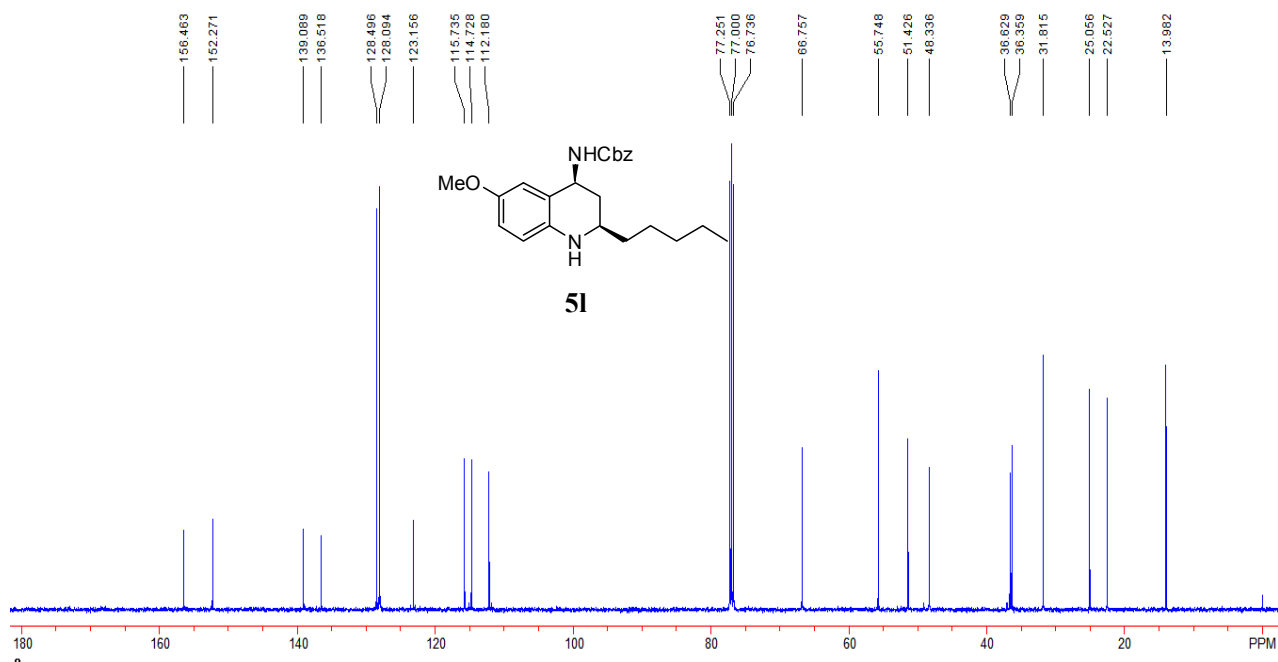

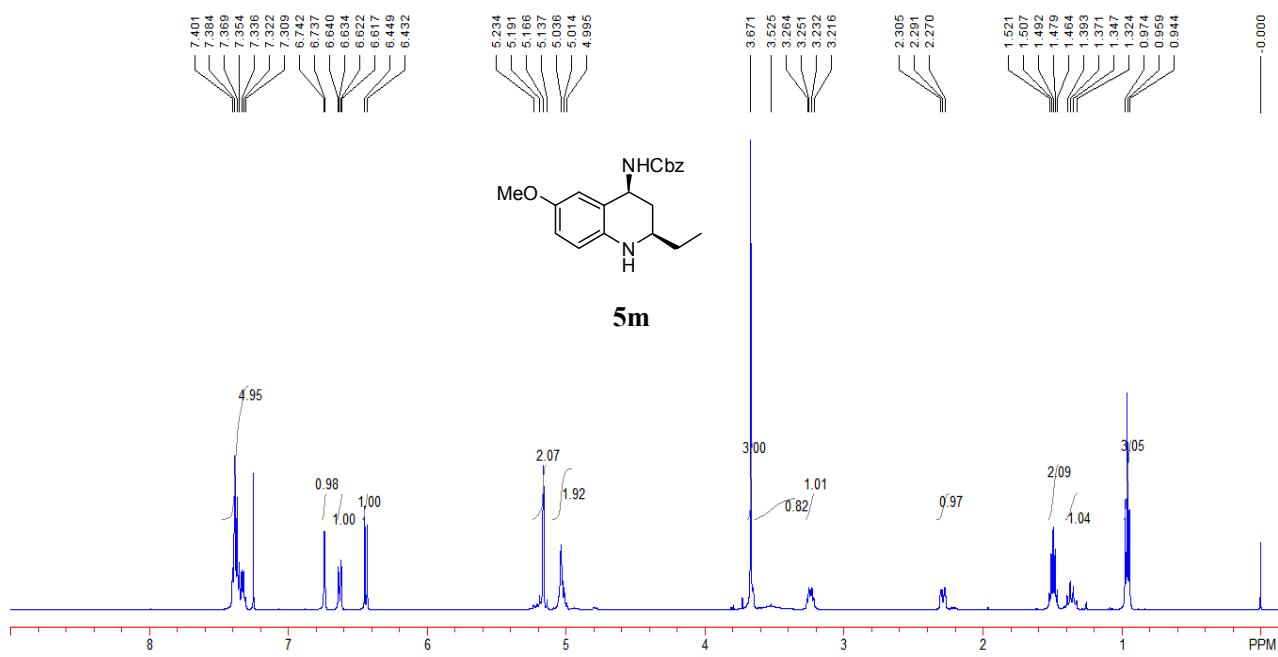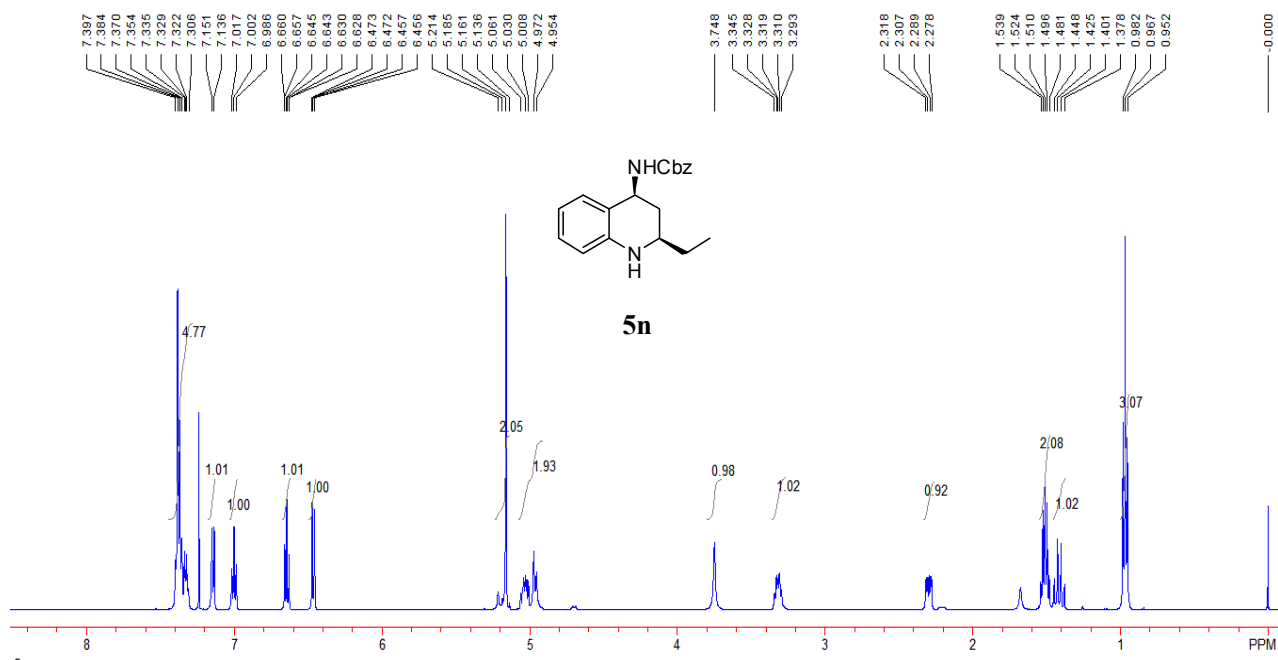

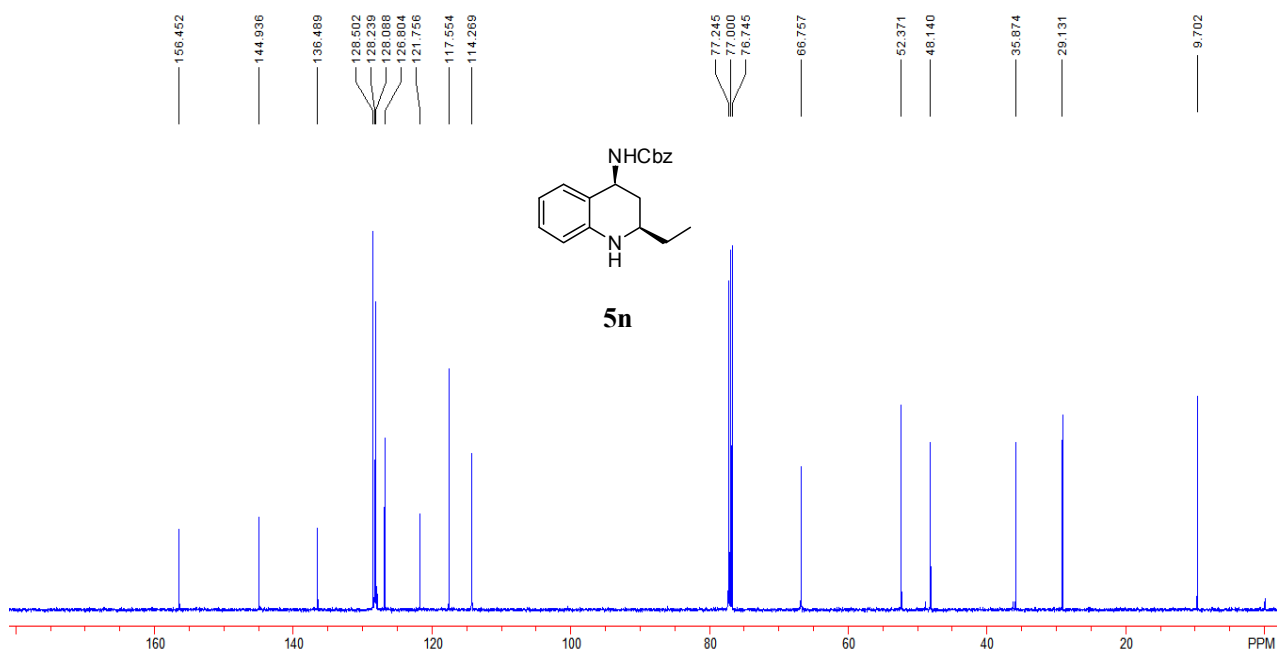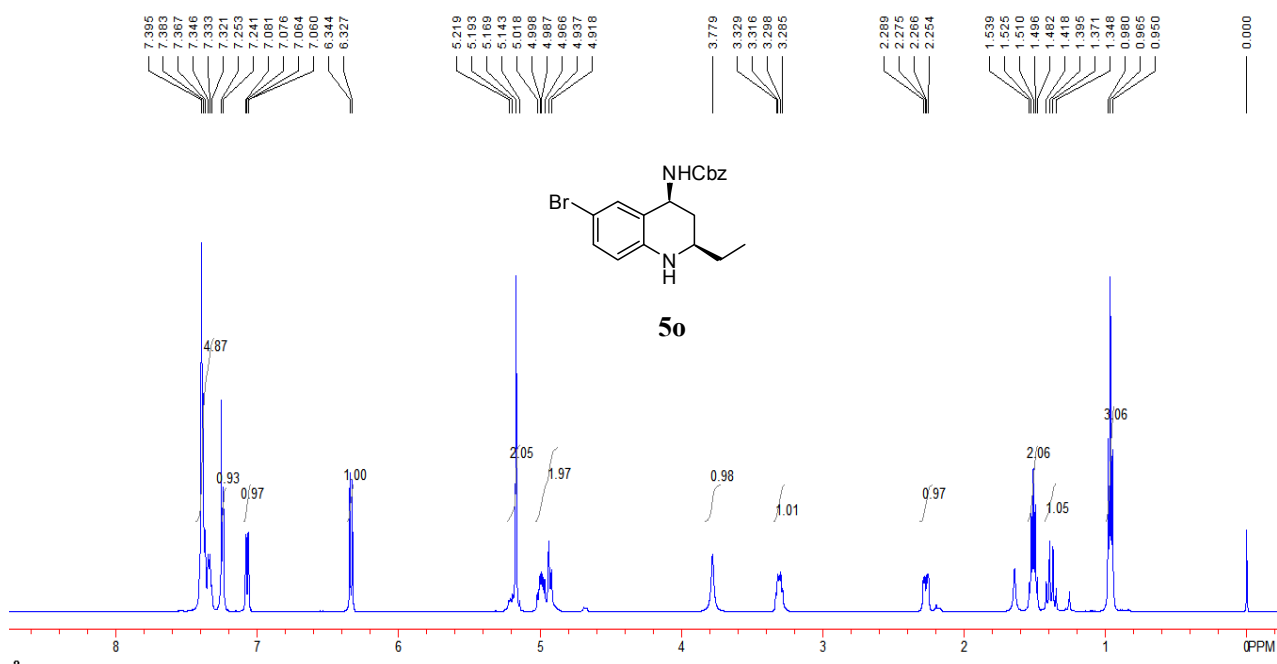

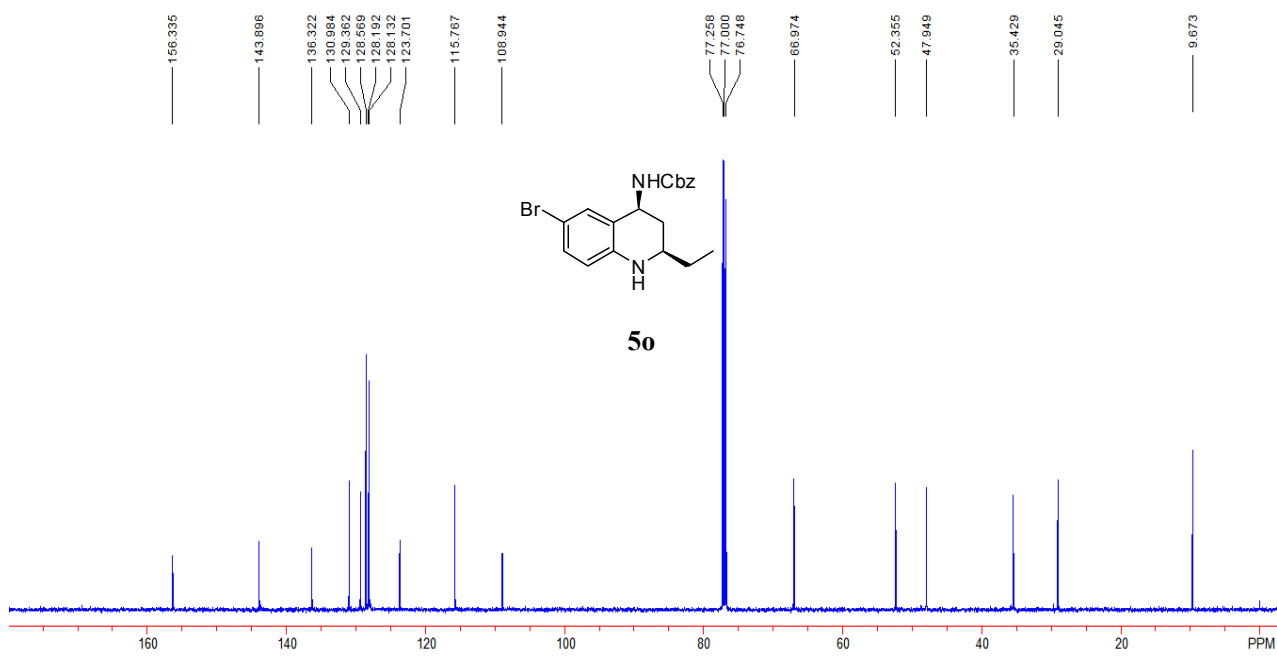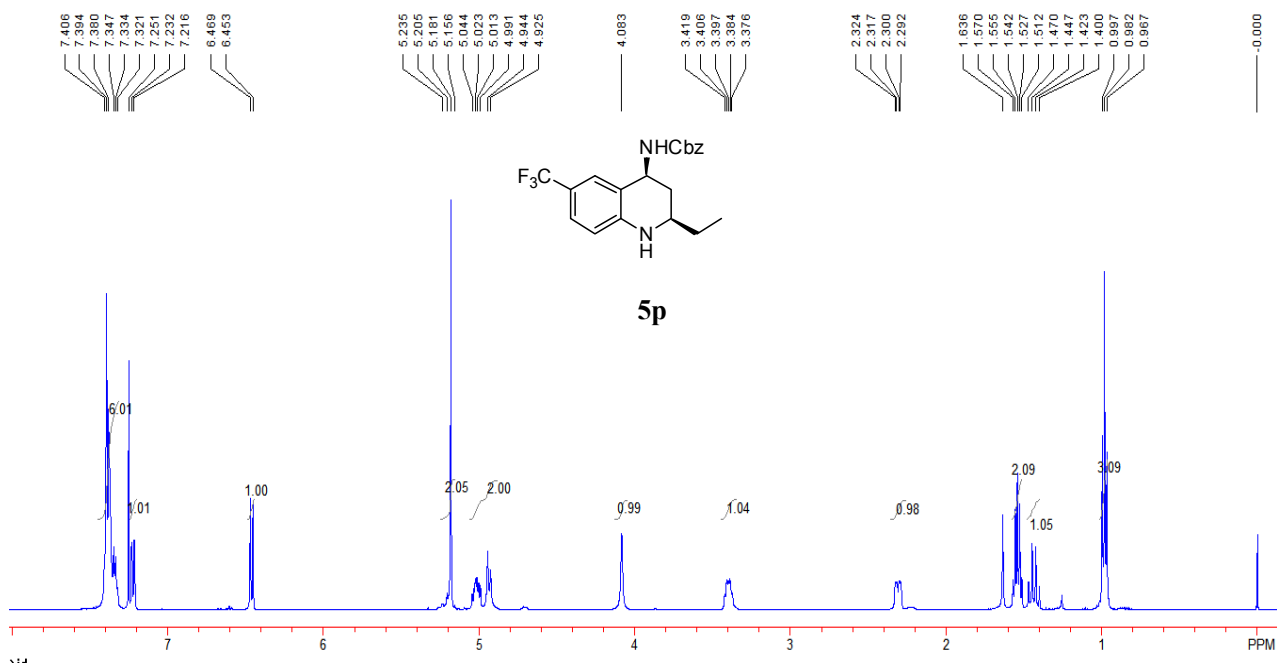

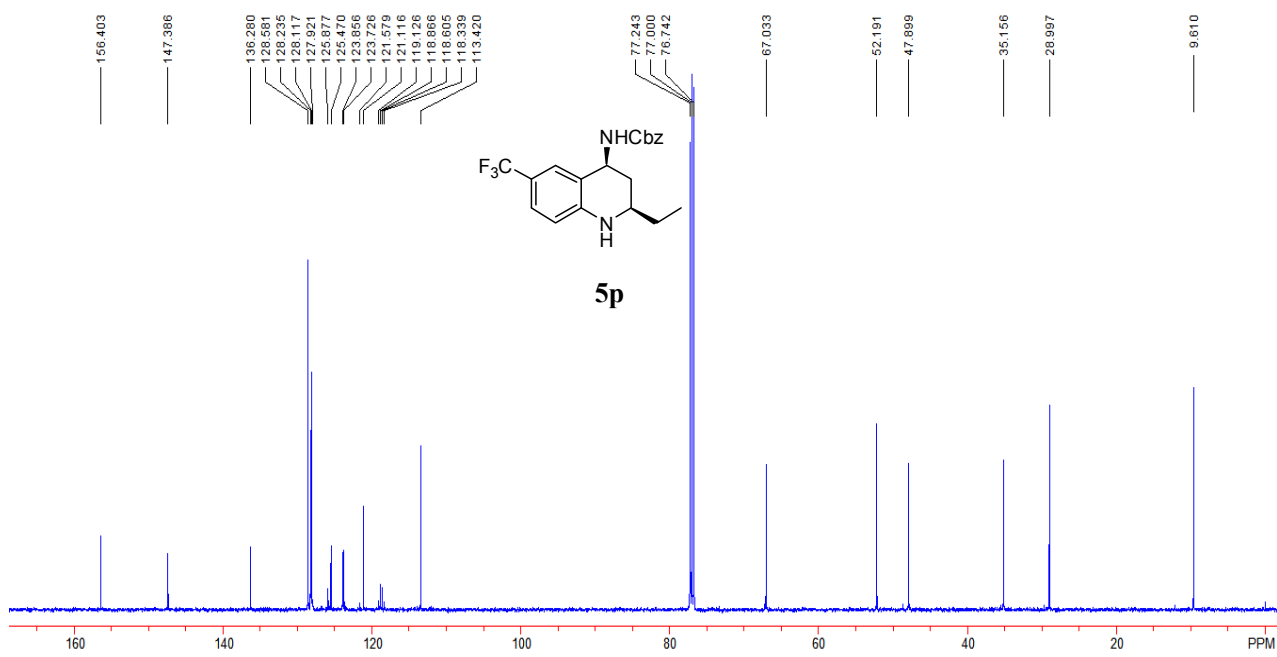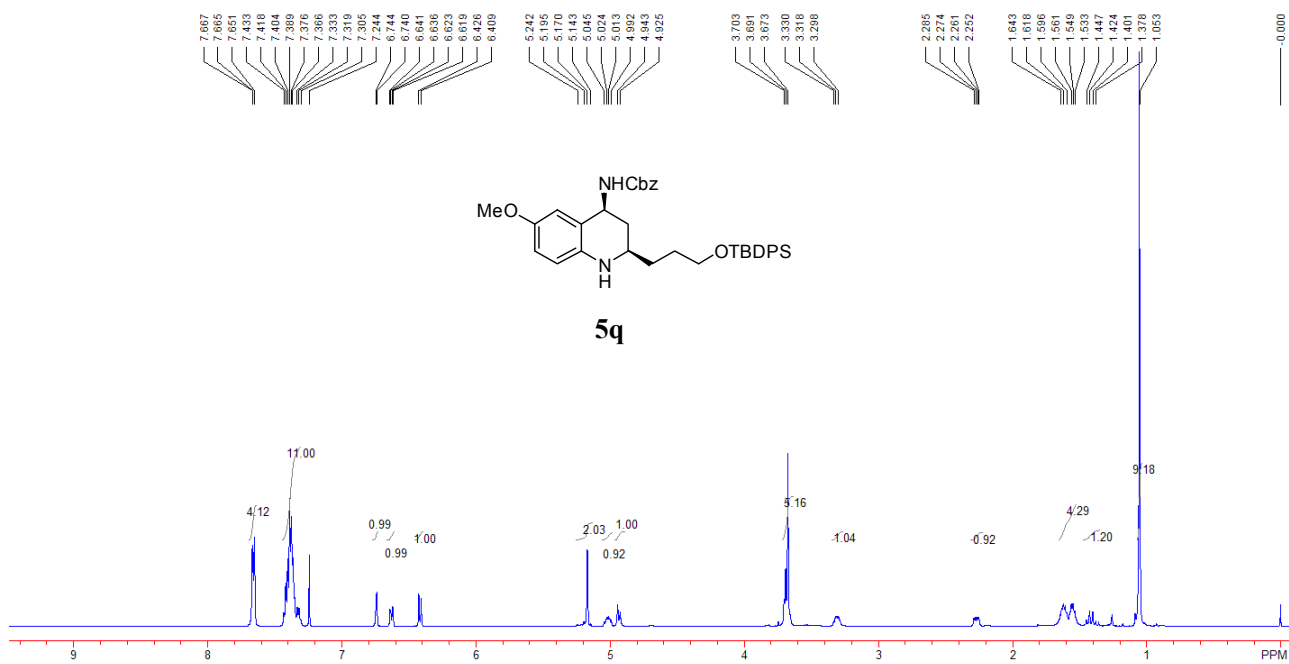

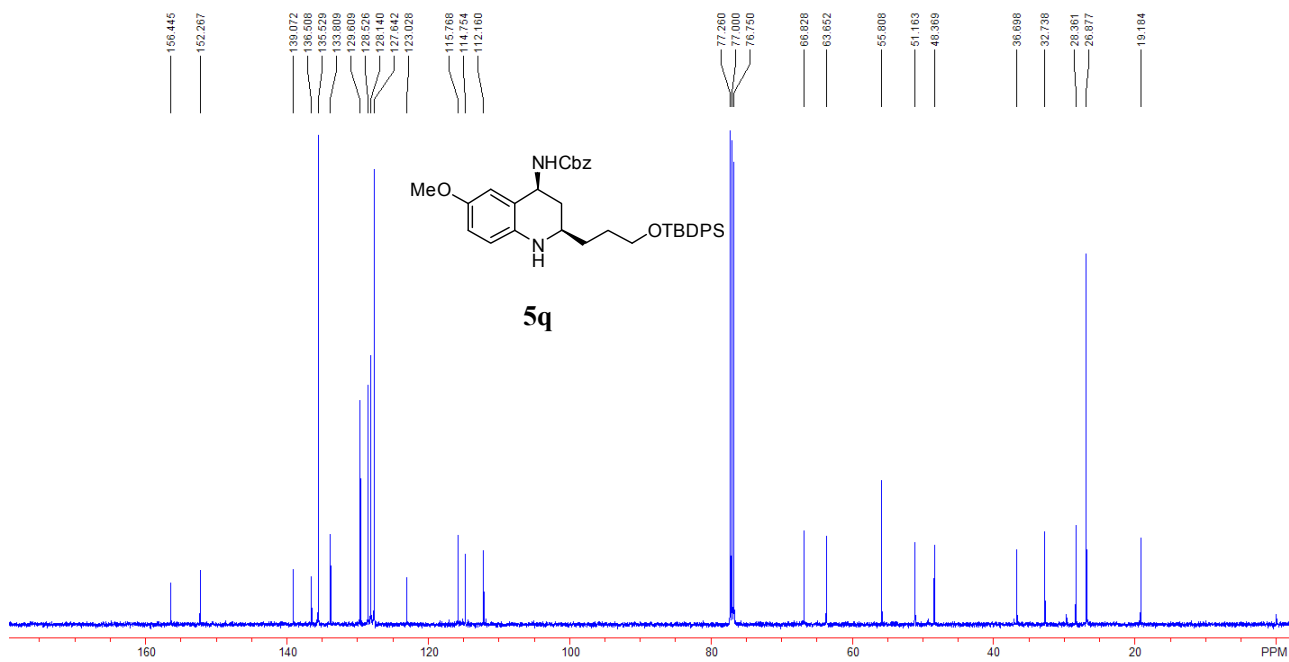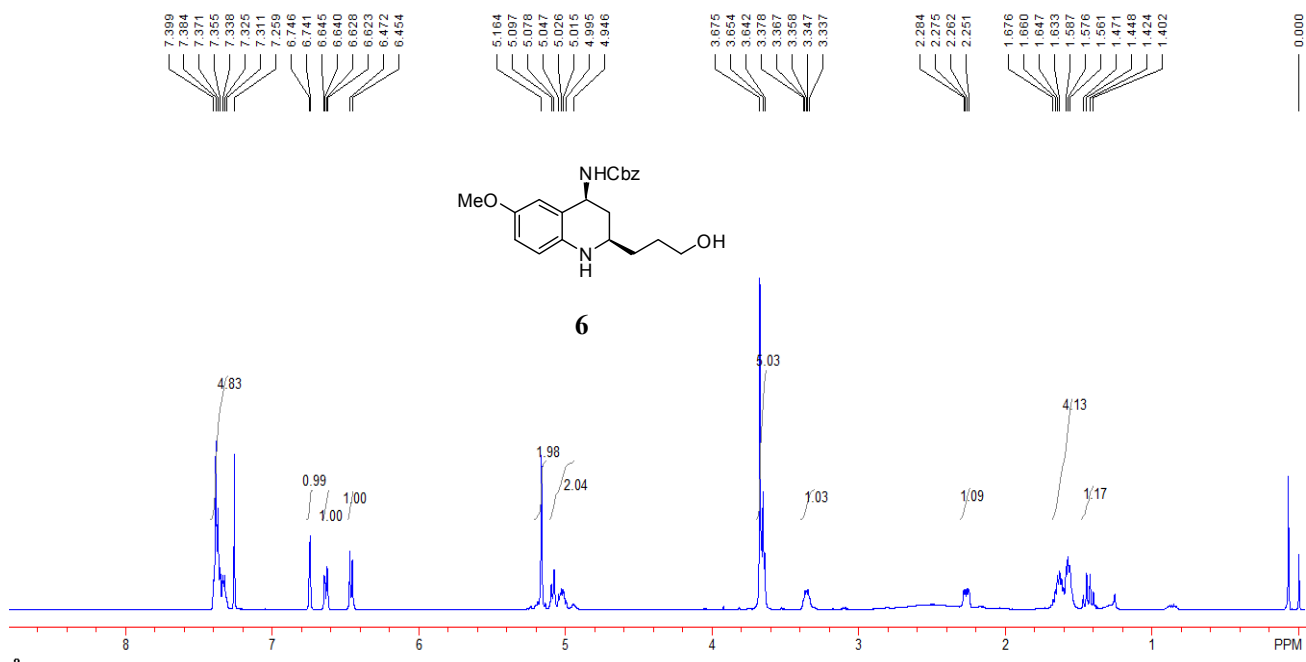

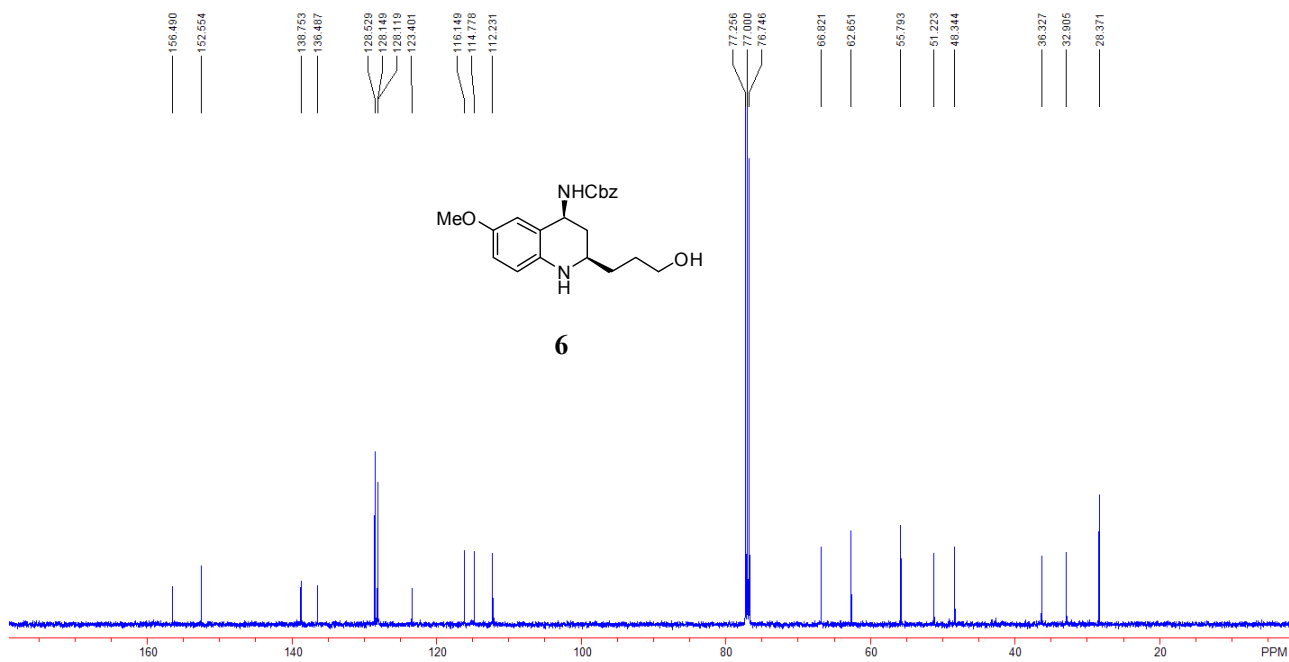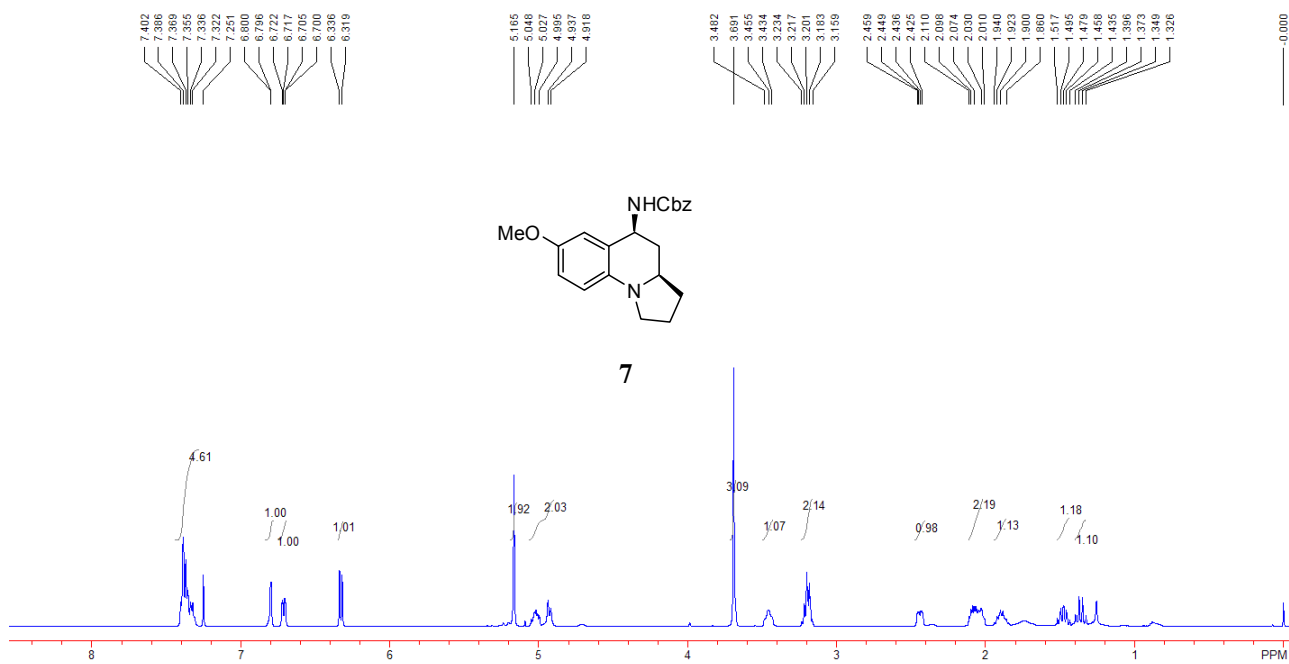



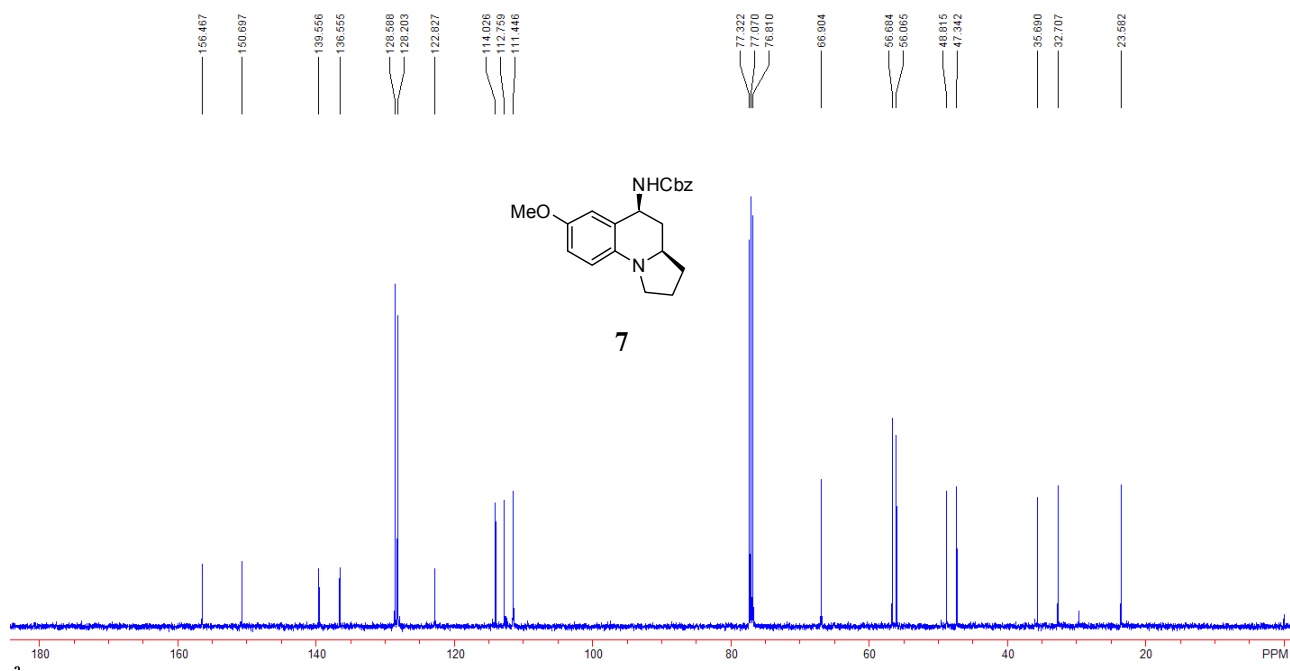

## 2. HPLC spectra for compounds 5a-5p, 6 and 7

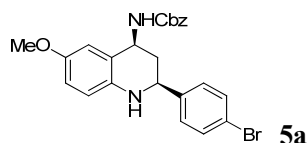

>99% ee. [Daicel Chiralcel OD-H, *n*-hexane / *i*-propanol = 70 / 30, 1.0 mL/min,  $\lambda$  = 254 nm]

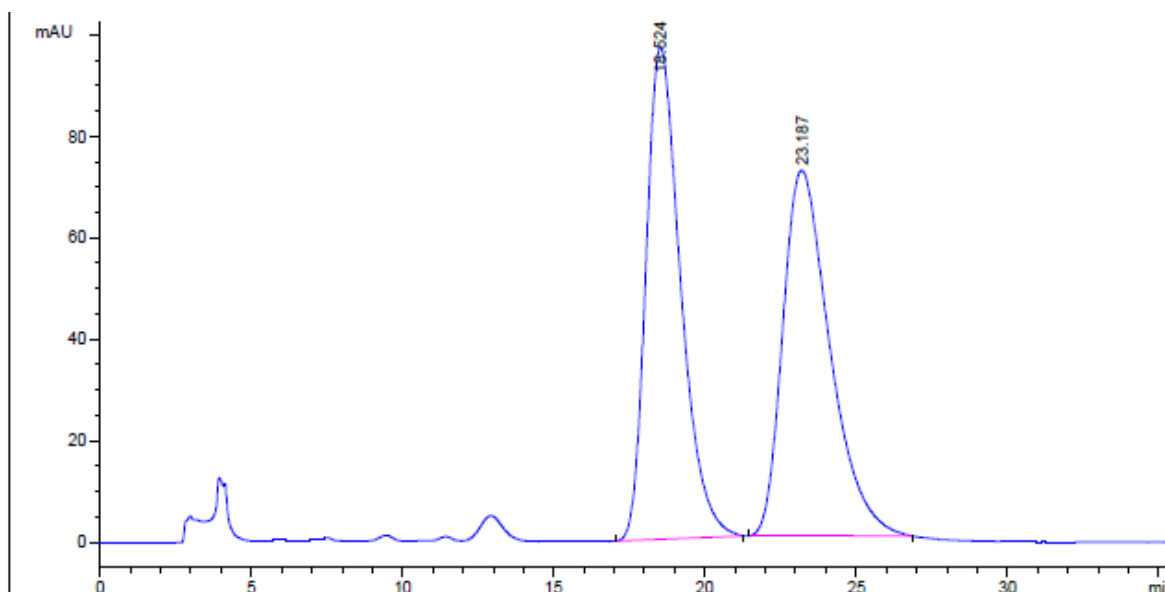

| Peak # | RetTime [min] | Type | Width [min] | Area mAU *s | Height [mAU] | Area %  |
|--------|---------------|------|-------------|-------------|--------------|---------|
| 1      | 18.524        | BB   | 1.1780      | 7709.13281  | 97.11187     | 49.6647 |
| 2      | 23.187        | BB   | 1.5739      | 7813.23535  | 72.13058     | 50.3353 |

Totals : 1.55224e4 169.24245

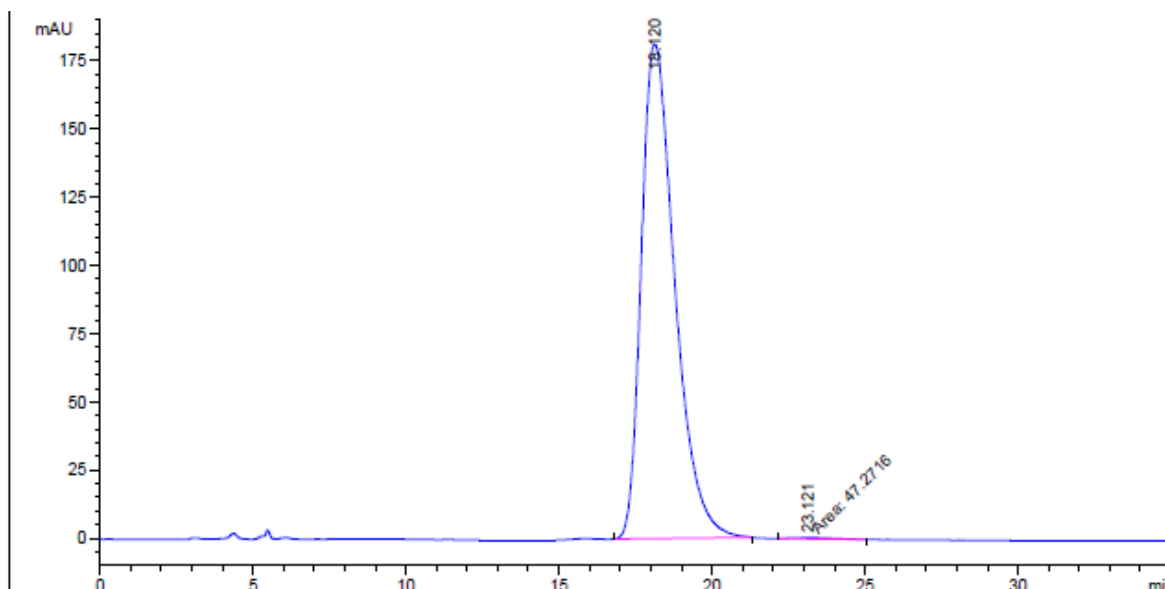

| Peak # | RetTime [min] | Type | Width [min] | Area mAU *s | Height [mAU] | Area %  |
|--------|---------------|------|-------------|-------------|--------------|---------|
| 1      | 18.120        | BB   | 1.1022      | 1.38335e4   | 181.40642    | 99.6594 |
| 2      | 23.121        | MM   | 1.4965      | 47.27156    | 5.26473e-1   | 0.3406  |

Totals : 1.38808e4 181.93289

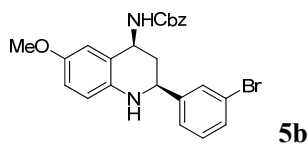

>99% ee. [Daicel Chiralcel OD-H, *n*-hexane / *i*-propanol = 70 / 30, 1.0 mL/min,  $\lambda$  = 254 nm]

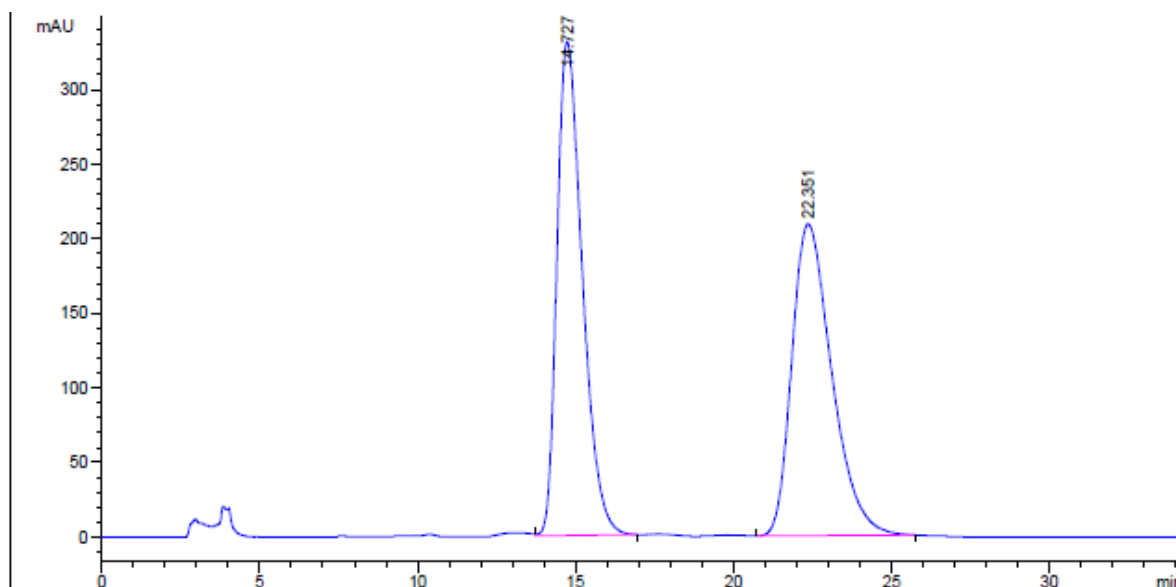

| Peak # | RetTime [min] | Type | Width [min] | Area mAU *s | Height [mAU] | Area %  |
|--------|---------------|------|-------------|-------------|--------------|---------|
| 1      | 14.727        | VB   | 0.8473      | 1.85198e4   | 331.27155    | 50.1666 |
| 2      | 22.351        | VB   | 1.3147      | 1.83968e4   | 209.10194    | 49.8334 |

Totals : 3.69166e4 540.37349

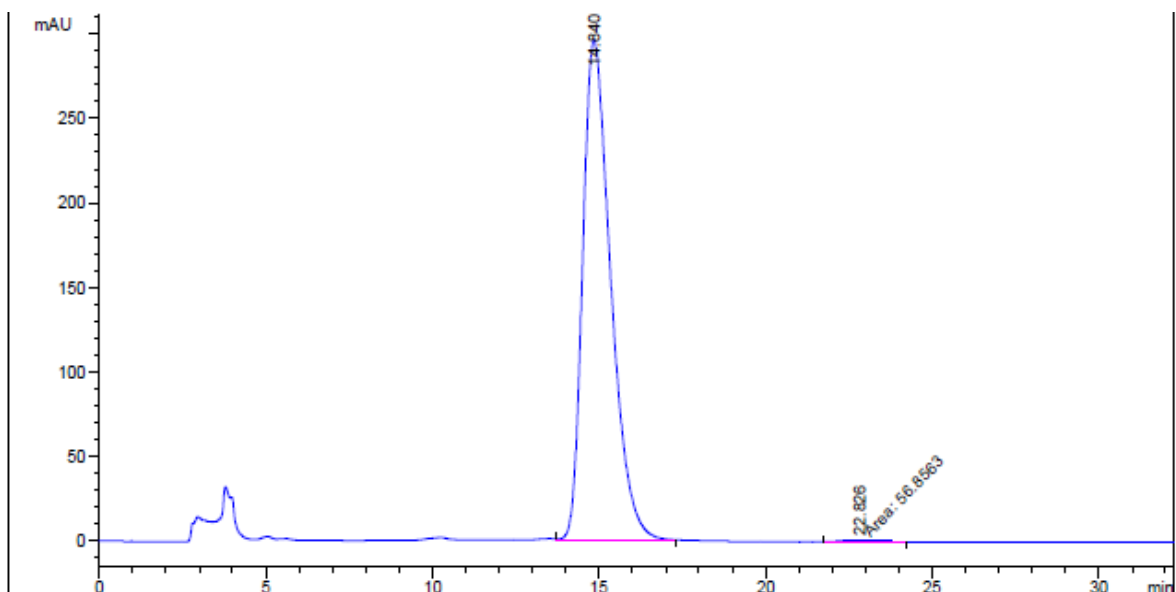

| Peak # | RetTime [min] | Type | Width [min] | Area mAU *s | Height [mAU] | Area %  |
|--------|---------------|------|-------------|-------------|--------------|---------|
| 1      | 14.840        | VB   | 0.8960      | 1.72558e4   | 295.83575    | 99.6716 |
| 2      | 22.826        | MM   | 1.3087      | 56.85627    | 7.24070e-1   | 0.3284  |

Totals : 1.73126e4 296.55982

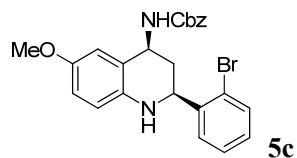

96% ee. [Daicel Chiralcel OJ-H, *n*-hexane / EtOH = 70 / 30, 1.2 mL/min,  $\lambda$  = 254 nm]

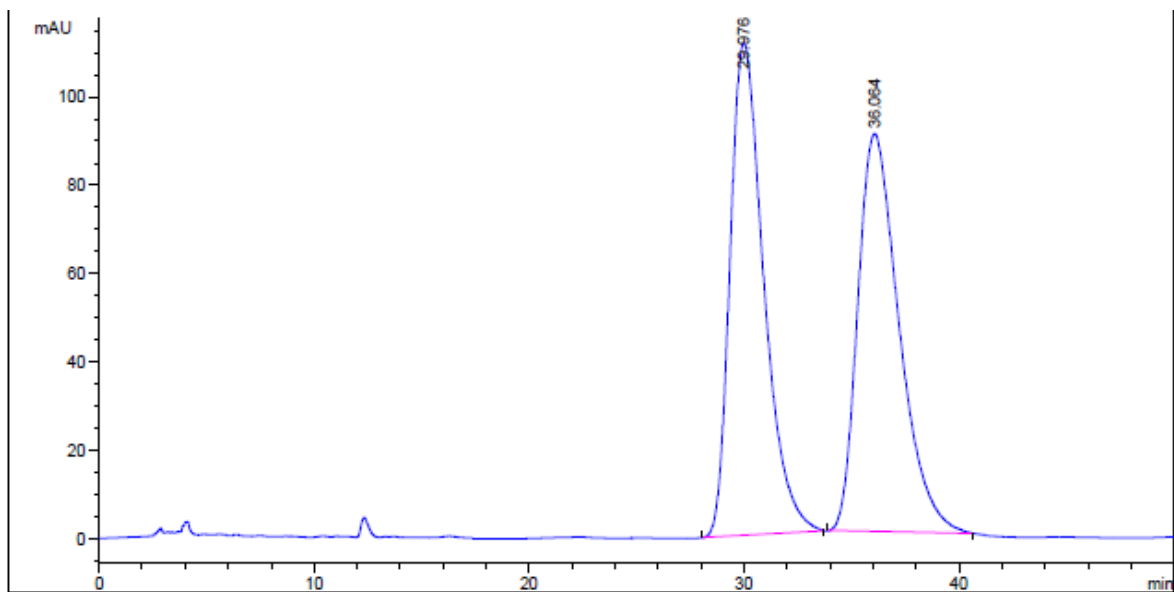

| Peak # | RetTime [min] | Type | Width [min] | Area mAU *s | Height [mAU] | Area %  |
|--------|---------------|------|-------------|-------------|--------------|---------|
| 1      | 29.976        | BB   | 1.6036      | 1.21605e4   | 111.56923    | 50.2512 |
| 2      | 36.064        | BB   | 1.9793      | 1.20389e4   | 90.11979     | 49.7488 |

Totals :                                         2.41994e4     201.68902

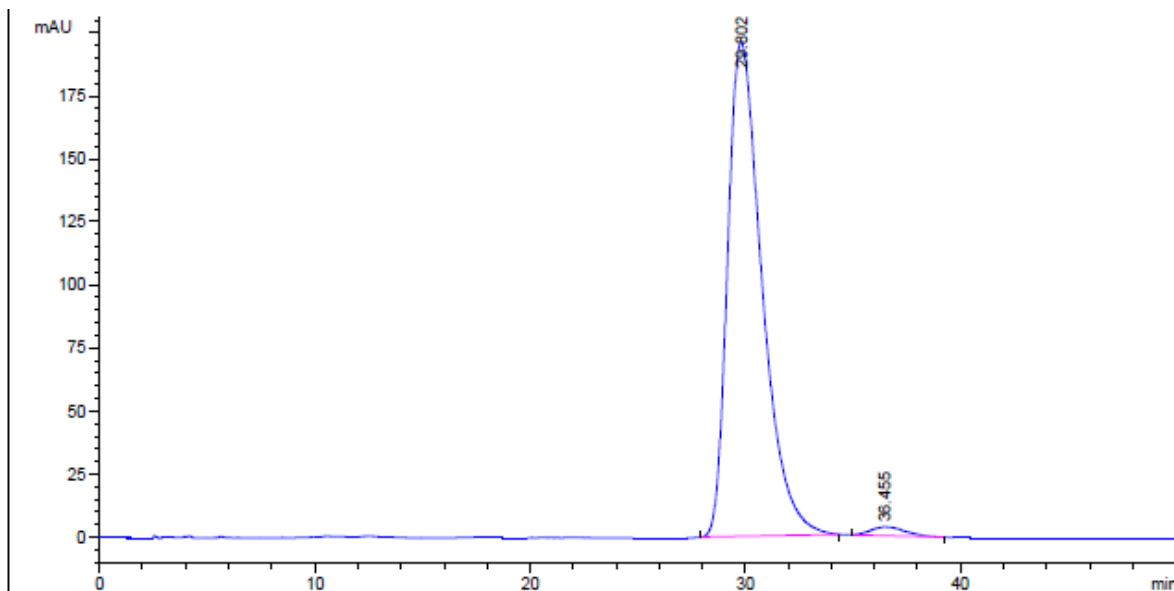

| Peak # | RetTime [min] | Type | Width [min] | Area mAU *s | Height [mAU] | Area %  |
|--------|---------------|------|-------------|-------------|--------------|---------|
| 1      | 29.802        | BB   | 1.6541      | 2.17963e4   | 196.22585    | 98.2123 |
| 2      | 36.455        | BP   | 1.3405      | 396.73459   | 3.51383      | 1.7877  |

Totals :                                         2.21931e4     199.73967

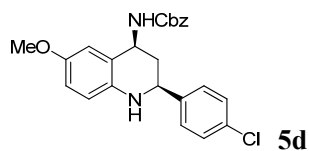

>99% ee. [Daicel Chiralcel OD-H, *n*-hexane / *i*-propanol = 70 / 30, 1.0 mL/min,  $\lambda$  = 254 nm]

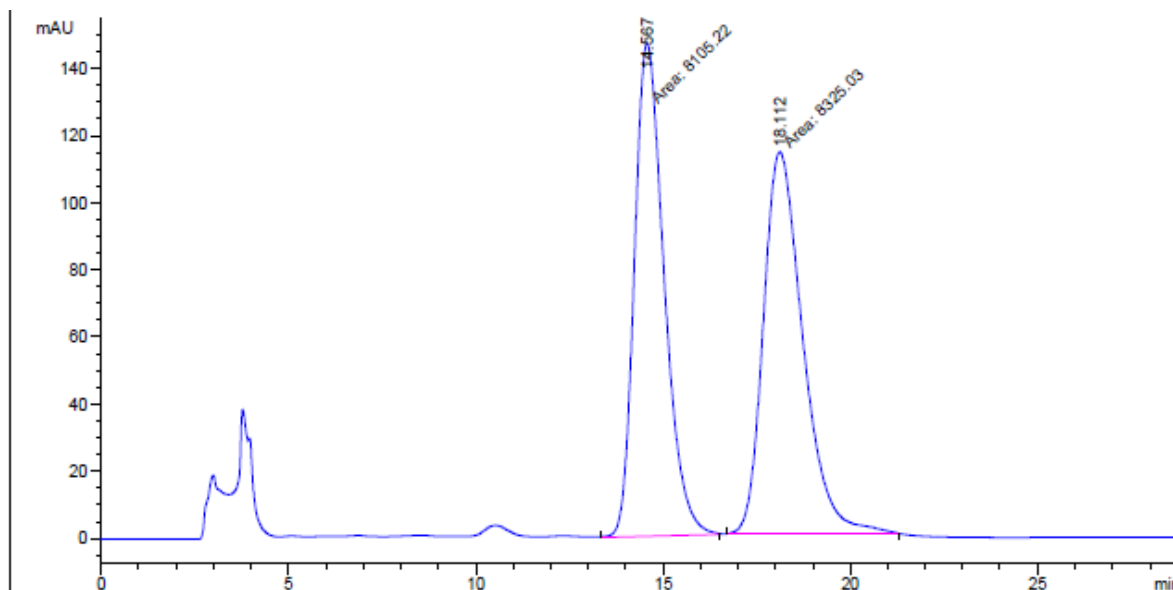

| Peak # | RetTime [min] | Type | Width [min] | Area mAU *s | Height [mAU] | Area %  |
|--------|---------------|------|-------------|-------------|--------------|---------|
| 1      | 14.567        | MM   | 0.9198      | 8105.22412  | 146.86246    | 49.3311 |
| 2      | 18.112        | MM   | 1.2213      | 8325.03320  | 113.60770    | 50.6689 |

Totals : 1.64303e4 260.47016

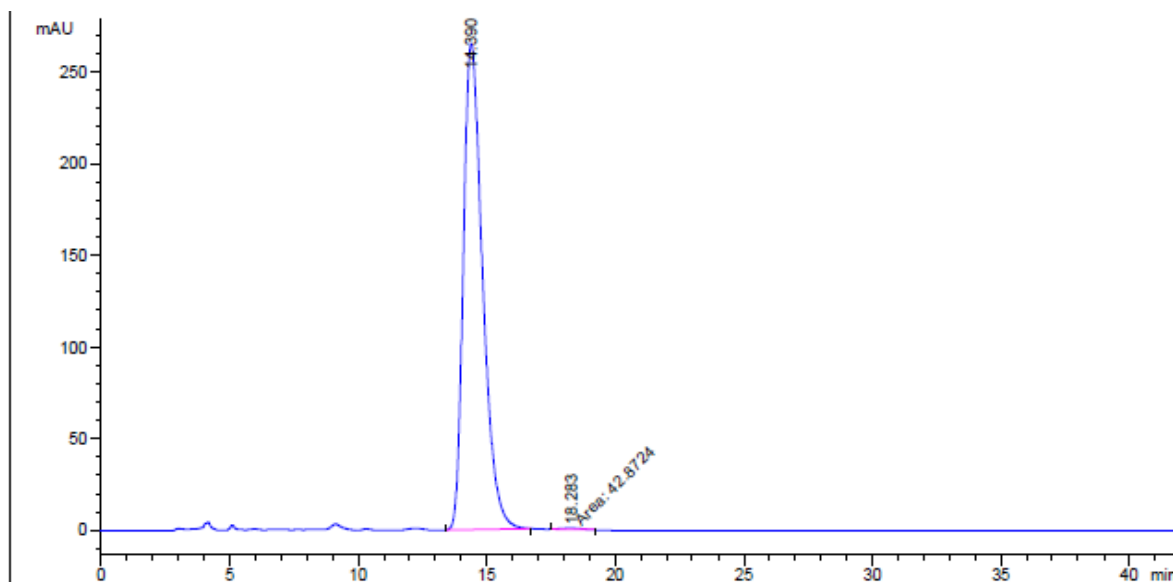

| Peak # | RetTime [min] | Type | Width [min] | Area mAU *s | Height [mAU] | Area %  |
|--------|---------------|------|-------------|-------------|--------------|---------|
| 1      | 14.390        | BB   | 0.7989      | 1.38147e4   | 265.02502    | 99.6906 |
| 2      | 18.283        | MM   | 0.9478      | 42.87241    | 7.53876e-1   | 0.3094  |

Totals : 1.38575e4 265.77890

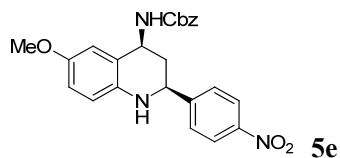

>99% ee. [Daicel Chiralcel OJ-H, *n*-hexane / EtOH / DEA = 60 / 40 / 0.1, 1.2 mL/min,  $\lambda$  = 254 nm]

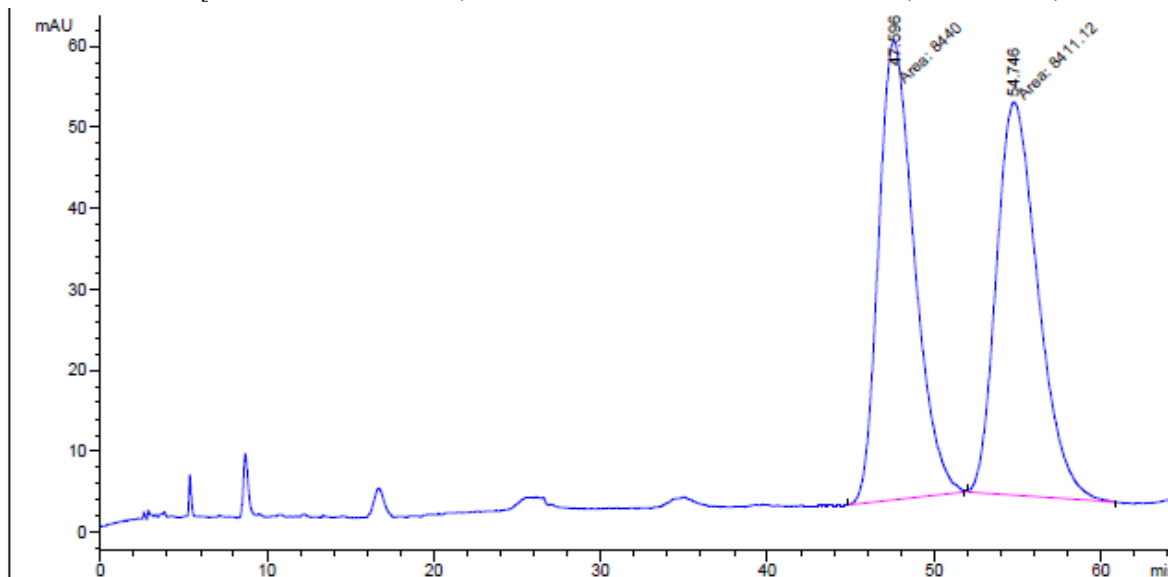

| Peak # | RetTime [min] | Type | Width [min] | Area mAU *s | Height [mAU] | Area %  |
|--------|---------------|------|-------------|-------------|--------------|---------|
| 1      | 47.596        | MM   | 2.4803      | 8440.00195  | 56.71302     | 50.0857 |
| 2      | 54.746        | MM   | 2.8893      | 8411.11719  | 48.51919     | 49.9143 |

Totals : 1.68511e4 105.23221

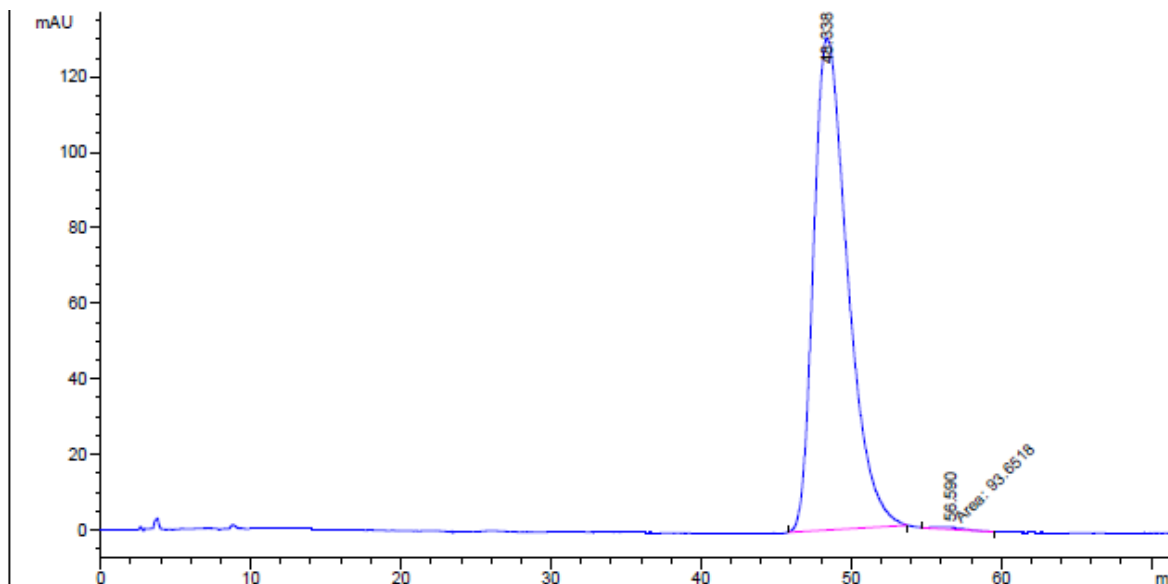

| Peak # | RetTime [min] | Type | Width [min] | Area mAU *s | Height [mAU] | Area %  |
|--------|---------------|------|-------------|-------------|--------------|---------|
| 1      | 48.338        | BB   | 1.9123      | 2.05911e4   | 130.48953    | 99.5472 |
| 2      | 56.590        | MM   | 2.4059      | 93.65184    | 6.48753e-1   | 0.4528  |

Totals : 2.06848e4 131.13829

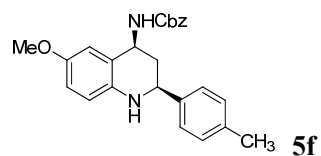

>99% ee. [Daicel Chiralcel OD-H, *n*-hexane / *i*-propanol = 70 / 30, 1.0 mL/min,  $\lambda$  = 254 nm]

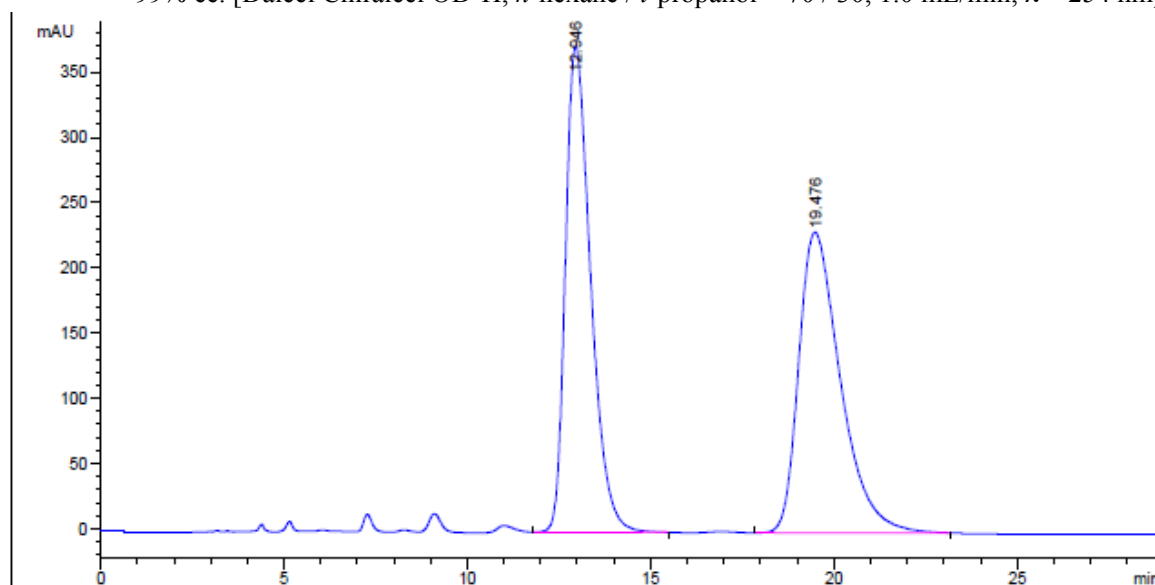

| Peak # | RetTime [min] | Type | Width [min] | Area mAU *s | Height [mAU] | Area %  |
|--------|---------------|------|-------------|-------------|--------------|---------|
| 1      | 12.946        | VB   | 0.7297      | 1.79349e4   | 373.09683    | 49.4918 |
| 2      | 19.476        | VB   | 1.1833      | 1.83033e4   | 230.70409    | 50.5082 |

Totals : 3.62382e4 603.80092

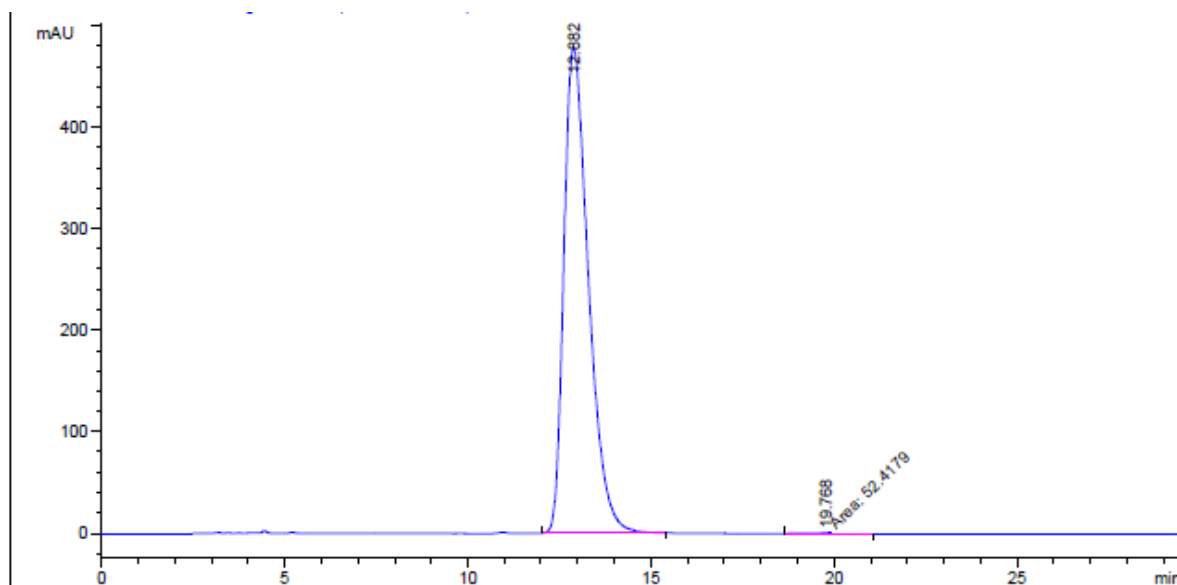

| Peak # | RetTime [min] | Type | Width [min] | Area mAU *s | Height [mAU] | Area %  |
|--------|---------------|------|-------------|-------------|--------------|---------|
| 1      | 12.882        | BB   | 0.7098      | 2.23461e4   | 478.15759    | 99.7660 |
| 2      | 19.768        | MM   | 1.3196      | 52.41792    | 6.62046e-1   | 0.2340  |

Totals : 2.23985e4 478.81964

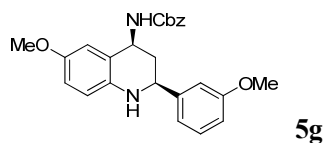

>99% ee. [Daicel Chiralcel OD-H, *n*-hexane / *i*-propanol = 70 / 30, 1.2 mL/min,  $\lambda$  = 254 nm]

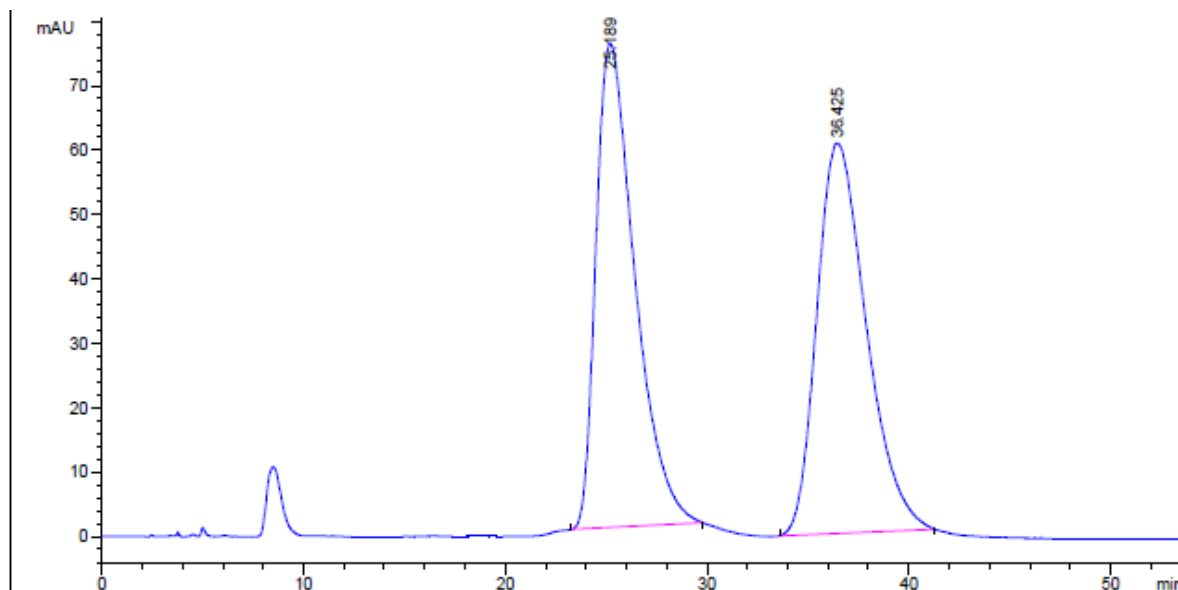

| Peak # | RetTime [min] | Type | Width [min] | Area mAU *s | Height [mAU] | Area %  |
|--------|---------------|------|-------------|-------------|--------------|---------|
| 1      | 25.189        | BB   | 1.9108      | 1.01109e4   | 75.26900     | 49.4095 |
| 2      | 36.425        | BB   | 2.0956      | 1.03526e4   | 60.67082     | 50.5905 |

Totals : 2.04635e4 135.93982

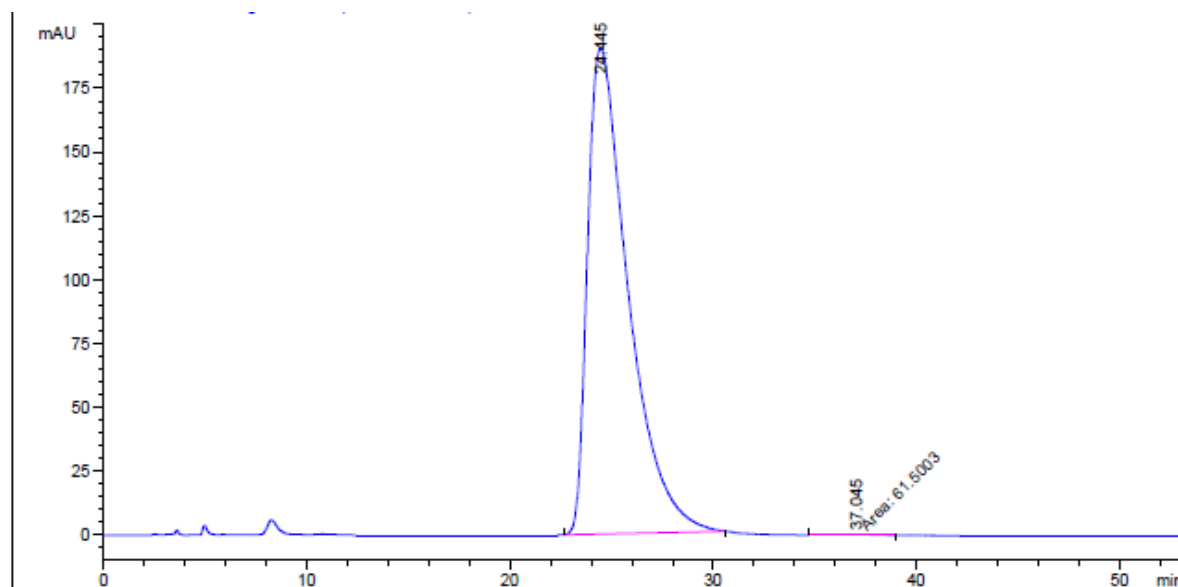

| Peak # | RetTime [min] | Type | Width [min] | Area mAU *s | Height [mAU] | Area %  |
|--------|---------------|------|-------------|-------------|--------------|---------|
| 1      | 24.445        | BB   | 2.0176      | 2.65253e4   | 190.33356    | 99.7687 |
| 2      | 37.045        | MM   | 2.4153      | 61.50032    | 4.24375e-1   | 0.2313  |

Totals : 2.65868e4 190.75793



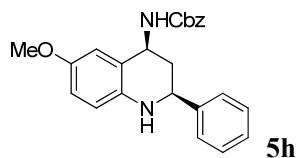

>99% ee. [Daicel Chiralcel OJ-H, *n*-hexane / EtOH = 60 / 40, 1.2 mL/min,  $\lambda$  = 254 nm]

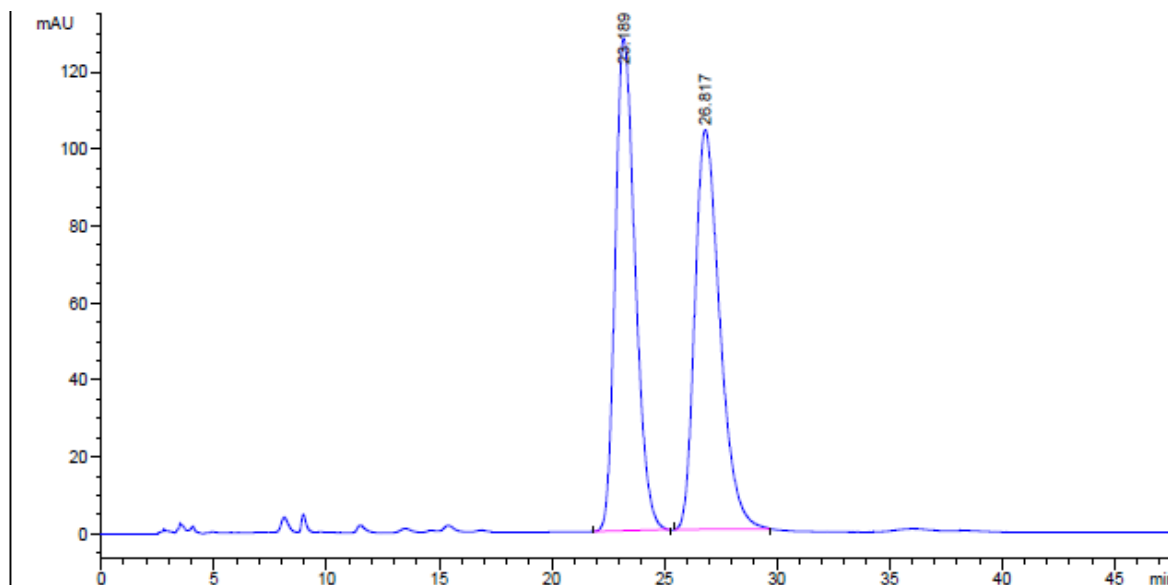

| Peak # | RetTime [min] | Type | Width [min] | Area mAU *s | Height [mAU] | Area %  |
|--------|---------------|------|-------------|-------------|--------------|---------|
| 1      | 23.189        | BB   | 0.9348      | 7889.86035  | 127.97105    | 49.6421 |
| 2      | 26.817        | BB   | 1.1608      | 8003.62109  | 103.89879    | 50.3579 |

Totals : 1.58935e4 231.86983

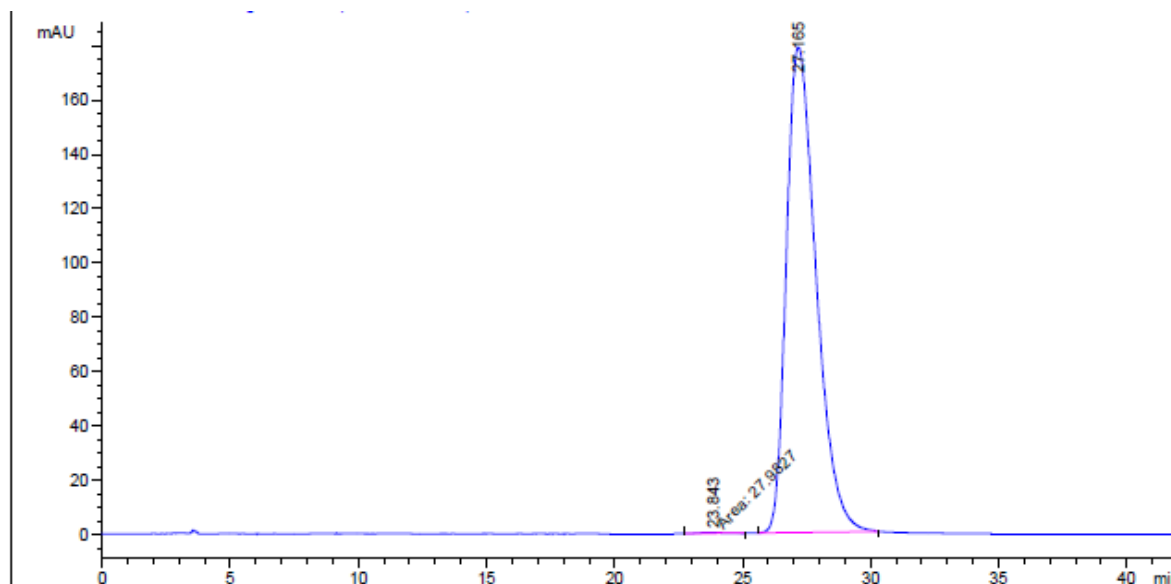

| Peak # | RetTime [min] | Type | Width [min] | Area mAU *s | Height [mAU] | Area %  |
|--------|---------------|------|-------------|-------------|--------------|---------|
| 1      | 23.843        | MM   | 1.0784      | 27.98271    | 4.32466e-1   | 0.1936  |
| 2      | 27.165        | BB   | 1.2255      | 1.44259e4   | 178.73514    | 99.8064 |

Totals : 1.44538e4 179.16760

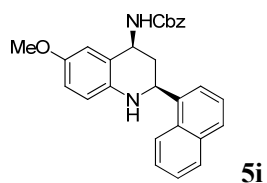

98% ee. [Daicel Chiralcel OJ-H, *n*-hexane / EtOH / DEA = 45 / 55 / 0.1, 1.2 mL/min,  $\lambda$  = 254 nm]

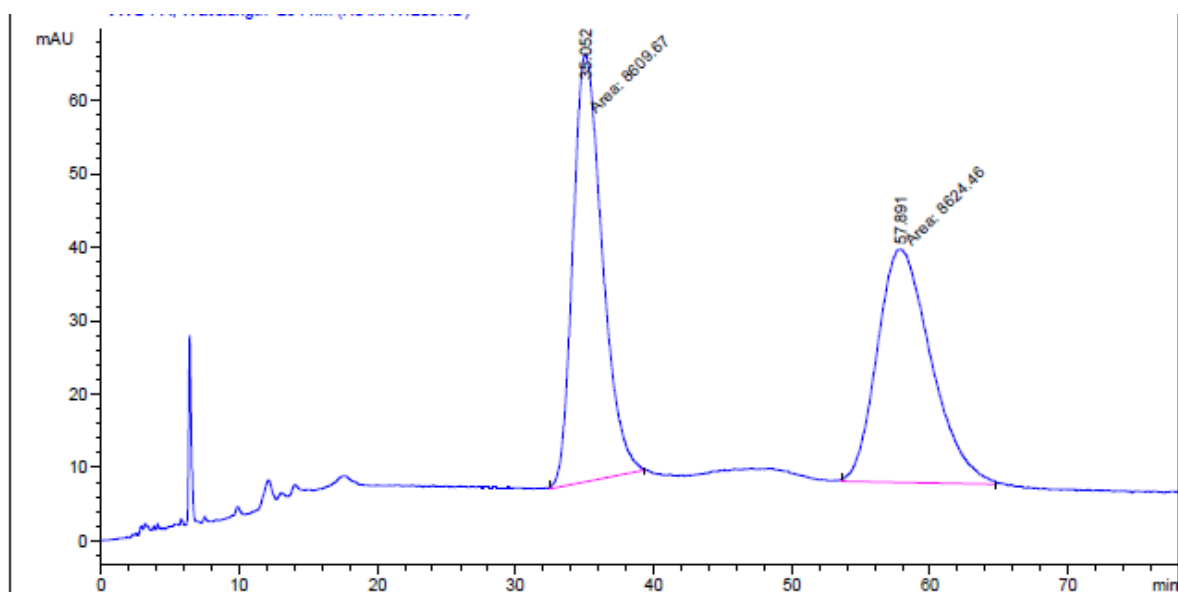

| Peak # | RetTime [min] | Type | Width [min] | Area mAU   | Area *s | Height [mAU] | Area %  |
|--------|---------------|------|-------------|------------|---------|--------------|---------|
| 1      | 35.052        | MM   | 2.4602      | 8609.67090 |         | 58.32669     | 49.9571 |
| 2      | 57.891        | MM   | 4.5201      | 8624.45703 |         | 31.80056     | 50.0429 |

Totals : 1.72341e4 90.12725

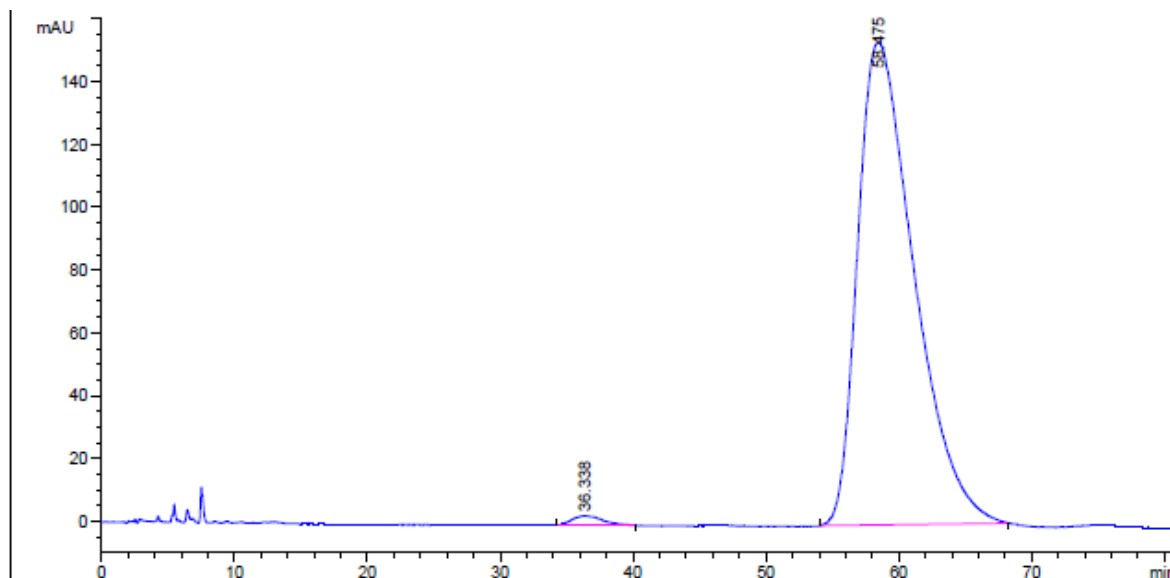

| Peak # | RetTime [min] | Type | Width [min] | Area mAU  | Area *s | Height [mAU] | Area %  |
|--------|---------------|------|-------------|-----------|---------|--------------|---------|
| 1      | 36.338        | VB   | 1.8923      | 491.55206 |         | 3.07076      | 1.0736  |
| 2      | 58.475        | BB   | 3.4996      | 4.52939e4 |         | 153.55031    | 98.9264 |

Totals : 4.57854e4 156.62107

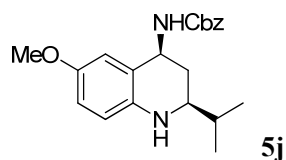

98% ee. [Daicel Chiralcel OJ-H, *n*-hexane / EtOH = 70 / 30, 1.2 mL/min,  $\lambda$  = 254 nm]

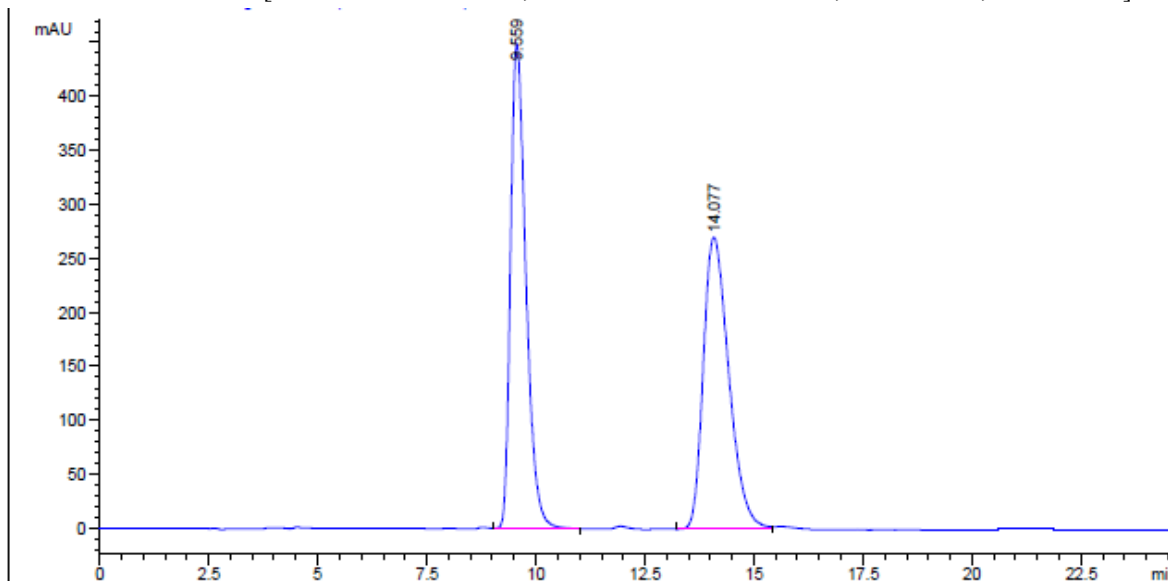

| Peak # | RetTime [min] | Type | Width [min] | Area mAU *s | Height [mAU] | Area %  |
|--------|---------------|------|-------------|-------------|--------------|---------|
| 1      | 9.559         | VB   | 0.3769      | 1.10303e4   | 448.92267    | 50.0405 |
| 2      | 14.077        | VB   | 0.6309      | 1.10124e4   | 270.41623    | 49.9595 |

Totals : 2.20427e4 719.33890

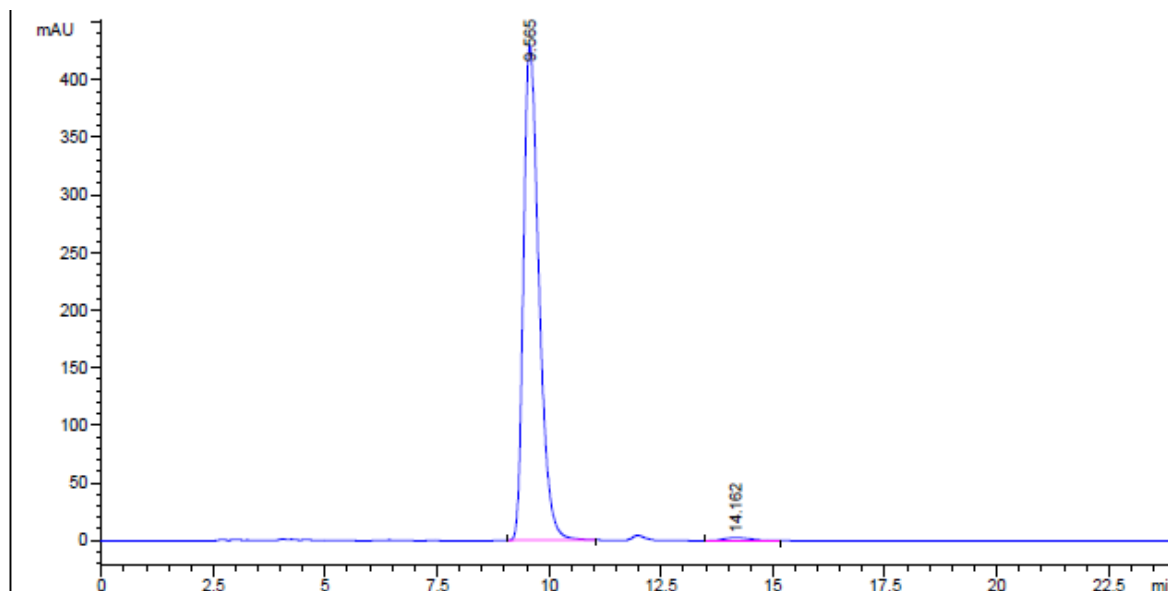

| Peak # | RetTime [min] | Type | Width [min] | Area mAU *s | Height [mAU] | Area %  |
|--------|---------------|------|-------------|-------------|--------------|---------|
| 1      | 9.565         | BB   | 0.3727      | 1.03621e4   | 430.22601    | 99.0893 |
| 2      | 14.162        | PP   | 0.5024      | 95.23485    | 2.50989      | 0.9107  |

Totals : 1.04573e4 432.73590

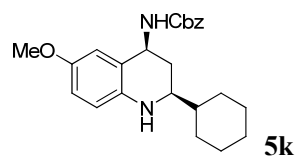

99% ee. [Daicel Chiralcel OJ-H, *n*-hexane / EtOH = 70 / 30, 1.2 mL/min,  $\lambda$  = 254 nm]

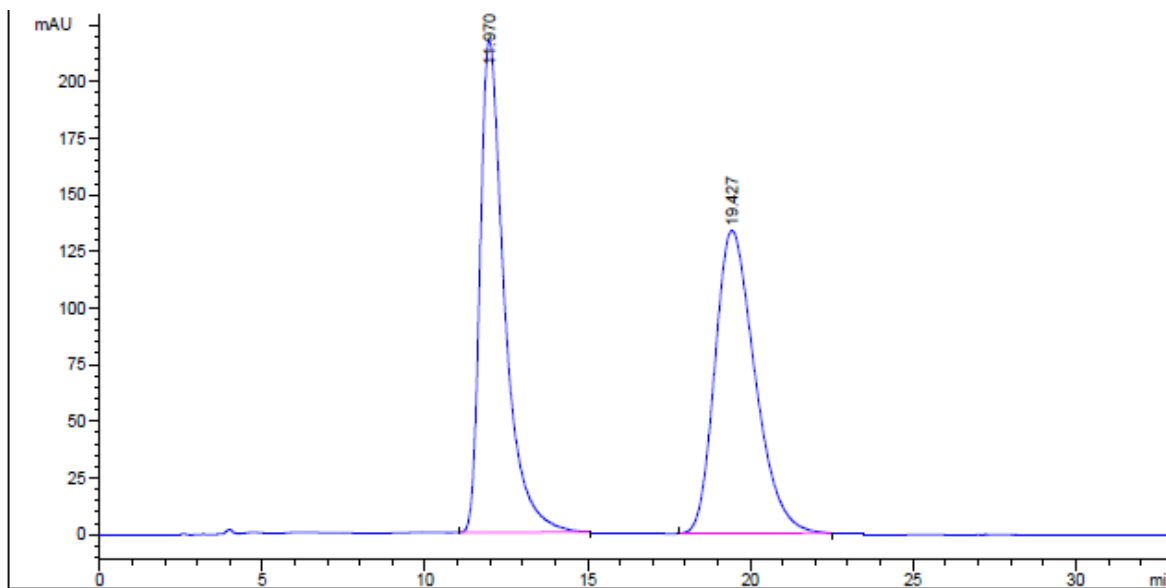

| Peak # | RetTime [min] | Type | Width [min] | Area mAU *s | Height [mAU] | Area %  |
|--------|---------------|------|-------------|-------------|--------------|---------|
| 1      | 11.970        | BB   | 0.7792      | 1.13692e4   | 217.87202    | 49.8708 |
| 2      | 19.427        | BB   | 1.3015      | 1.14281e4   | 133.89738    | 50.1292 |

Totals : 2.27972e4 351.76941

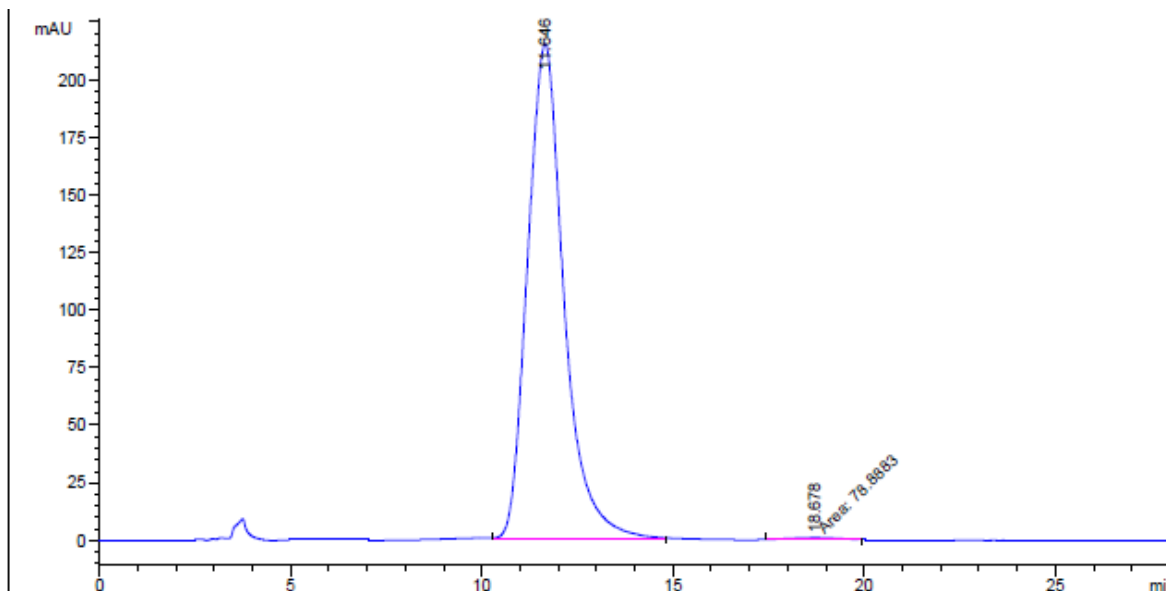

| Peak # | RetTime [min] | Type | Width [min] | Area mAU *s | Height [mAU] | Area %  |
|--------|---------------|------|-------------|-------------|--------------|---------|
| 1      | 11.646        | BB   | 1.0335      | 1.41800e4   | 214.45995    | 99.4467 |
| 2      | 18.678        | MM   | 1.4728      | 78.88827    | 8.92705e-1   | 0.5533  |

Totals : 1.42589e4 215.35265

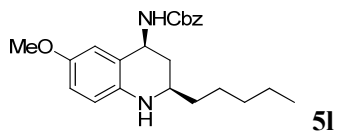

99% ee. [Daicel Chiralcel OJ-H, *n*-hexane / EtOH = 70 / 30, 1.2 mL/min,  $\lambda$  = 254 nm]

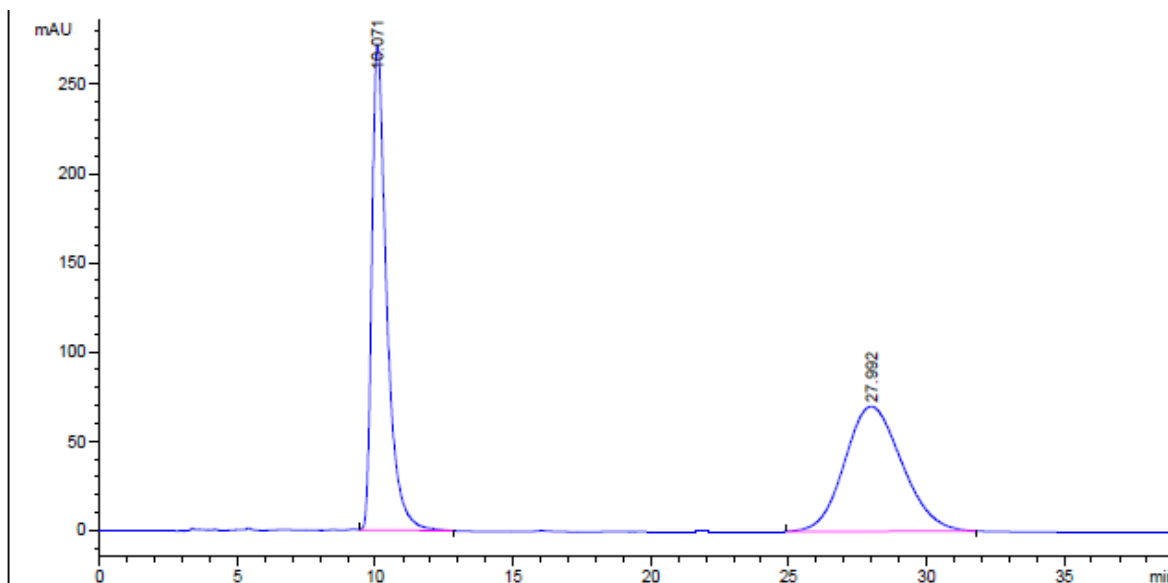

| Peak # | RetTime [min] | Type | Width [min] | Area mAU *s | Height [mAU] | Area %  |
|--------|---------------|------|-------------|-------------|--------------|---------|
| 1      | 10.071        | VB   | 0.5632      | 1.02365e4   | 272.66724    | 50.2075 |
| 2      | 27.992        | BB   | 2.0759      | 1.01518e4   | 70.02055     | 49.7925 |

Totals : 2.03883e4 342.68778

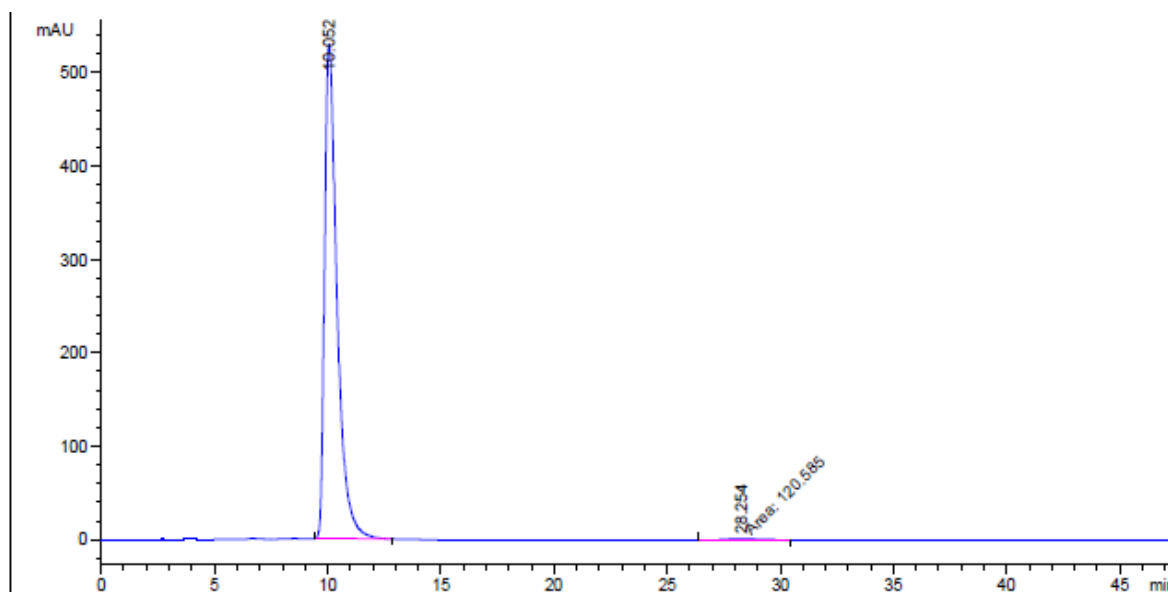

| Peak # | RetTime [min] | Type | Width [min] | Area mAU *s | Height [mAU] | Area %  |
|--------|---------------|------|-------------|-------------|--------------|---------|
| 1      | 10.052        | BB   | 0.5787      | 2.02792e4   | 528.48950    | 99.4089 |
| 2      | 28.254        | MM   | 2.1744      | 120.58539   | 9.24302e-1   | 0.5911  |

Totals : 2.03998e4 529.41380

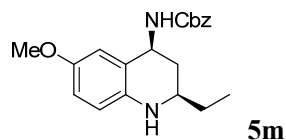

98% ee. [Daicel Chiralcel OJ-H, *n*-hexane / EtOH = 75 / 25, 1.2 mL/min,  $\lambda$  = 254 nm]

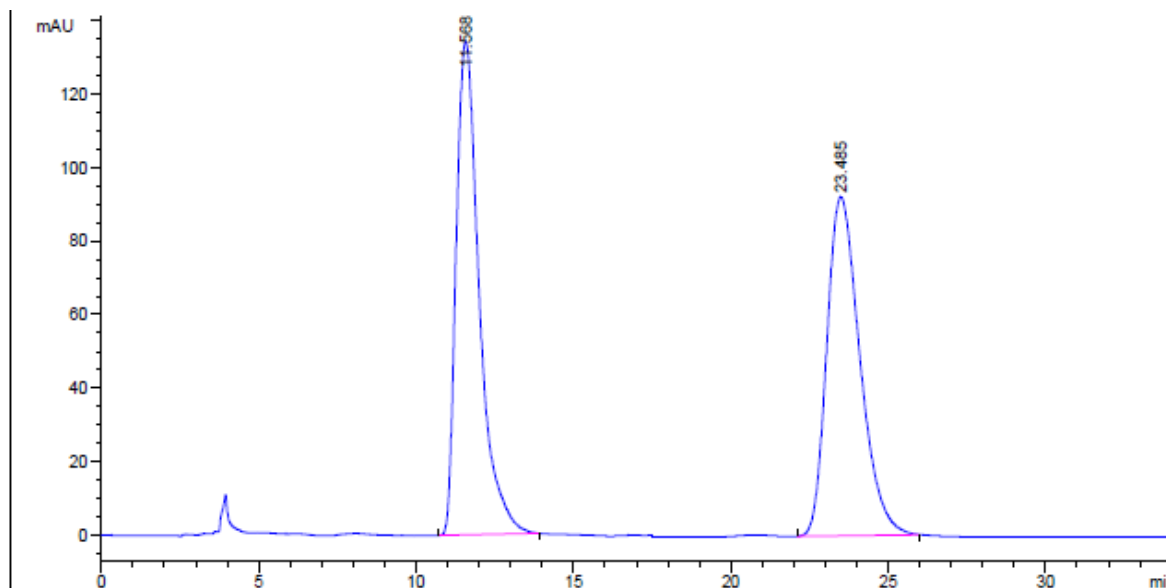

| Peak # | RetTime [min] | Type | Width [min] | Area mAU *s | Height [mAU] | Area %  |
|--------|---------------|------|-------------|-------------|--------------|---------|
| 1      | 11.568        | BB   | 0.7879      | 6864.11377  | 134.43452    | 50.4847 |
| 2      | 23.485        | BB   | 1.1178      | 6732.29980  | 92.25476     | 49.5153 |

Totals : 1.35964e4 226.68929

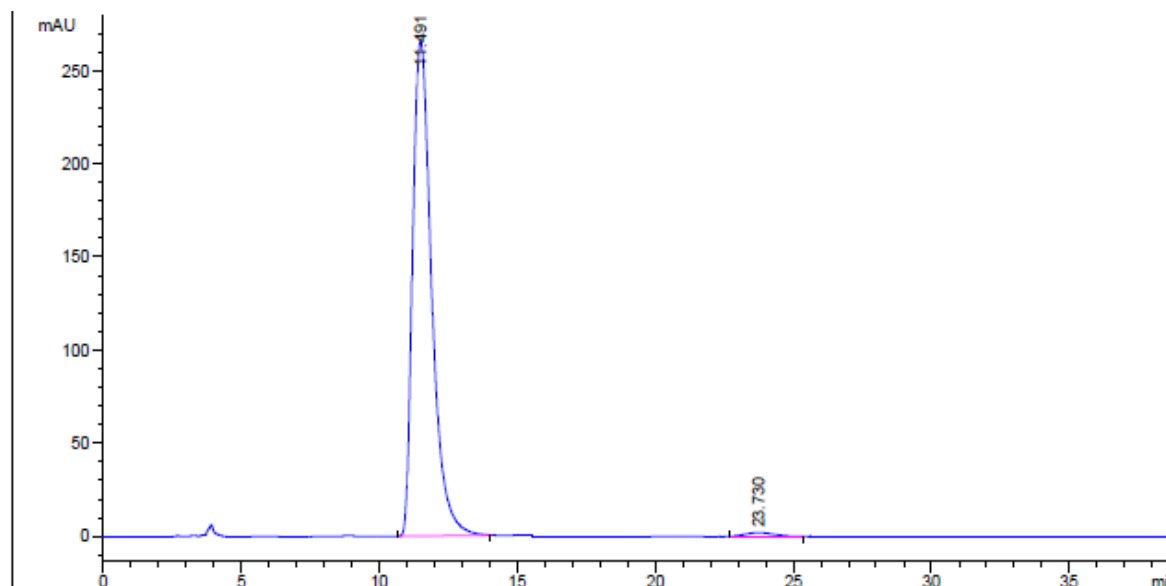

| Peak # | RetTime [min] | Type | Width [min] | Area mAU *s | Height [mAU] | Area %  |
|--------|---------------|------|-------------|-------------|--------------|---------|
| 1      | 11.491        | BB   | 0.7445      | 1.27270e4   | 266.01215    | 98.8956 |
| 2      | 23.730        | BB   | 0.8159      | 142.12759   | 2.08047      | 1.1044  |

Totals : 1.28692e4 268.09262

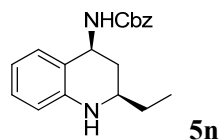

99% ee. [Daicel Chiralcel OJ-H, *n*-hexane / EtOH = 75 / 25, 1.2 mL/min,  $\lambda$  = 254 nm]

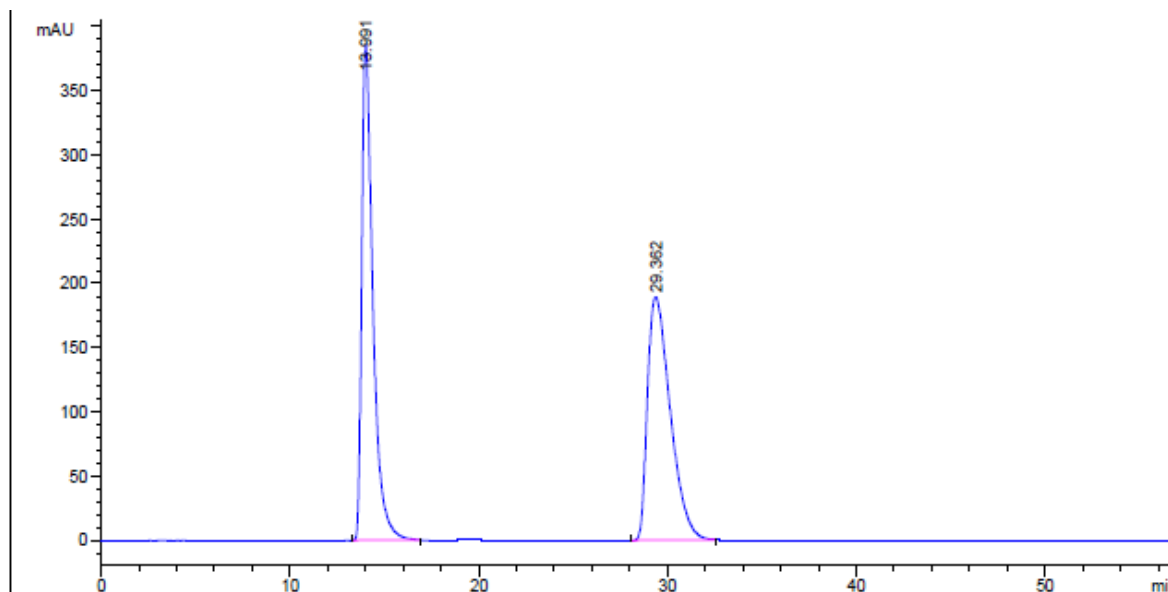

| Peak # | RetTime [min] | Type | Width [min] | Area mAU *s | Height [mAU] | Area %  |
|--------|---------------|------|-------------|-------------|--------------|---------|
| 1      | 13.991        | PB   | 0.6236      | 1.59421e4   | 385.55374    | 50.0574 |
| 2      | 29.362        | BB   | 1.2466      | 1.59055e4   | 189.59758    | 49.9426 |

Totals : 3.18476e4 575.15132

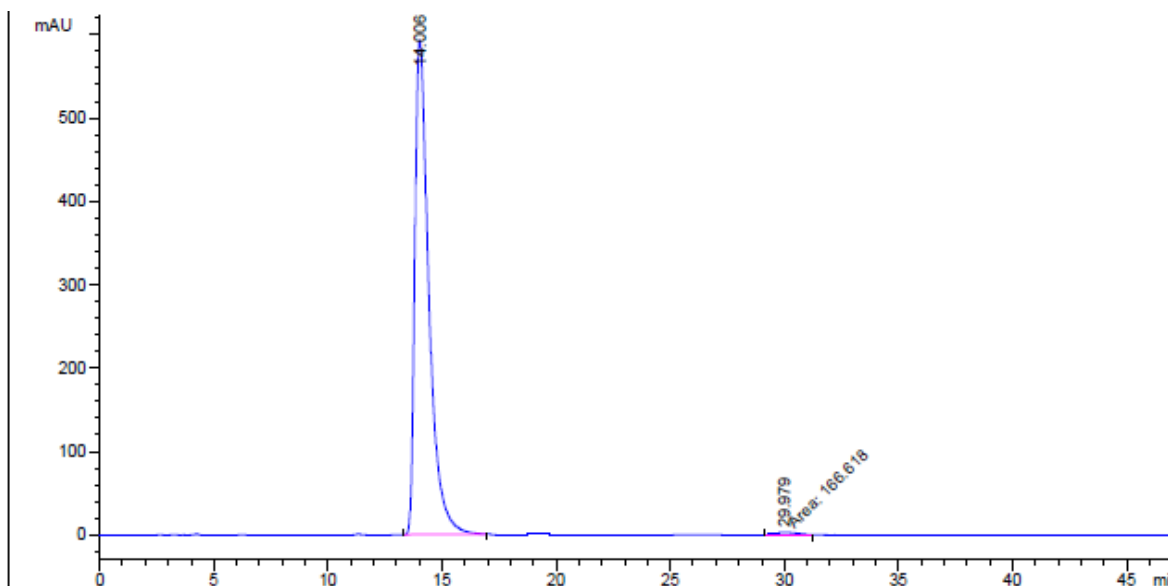

| Peak # | RetTime [min] | Type | Width [min] | Area mAU *s | Height [mAU] | Area %  |
|--------|---------------|------|-------------|-------------|--------------|---------|
| 1      | 14.006        | PB   | 0.6476      | 2.55111e4   | 592.87854    | 99.3511 |
| 2      | 29.979        | MM   | 1.0520      | 166.61804   | 2.63979      | 0.6489  |

Totals : 2.56777e4 595.51833

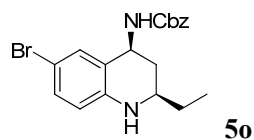

98% ee. [Daicel Chiralcel OJ-H, *n*-hexane / EtOH = 70 / 30, 1.2 mL/min,  $\lambda$  = 254 nm]

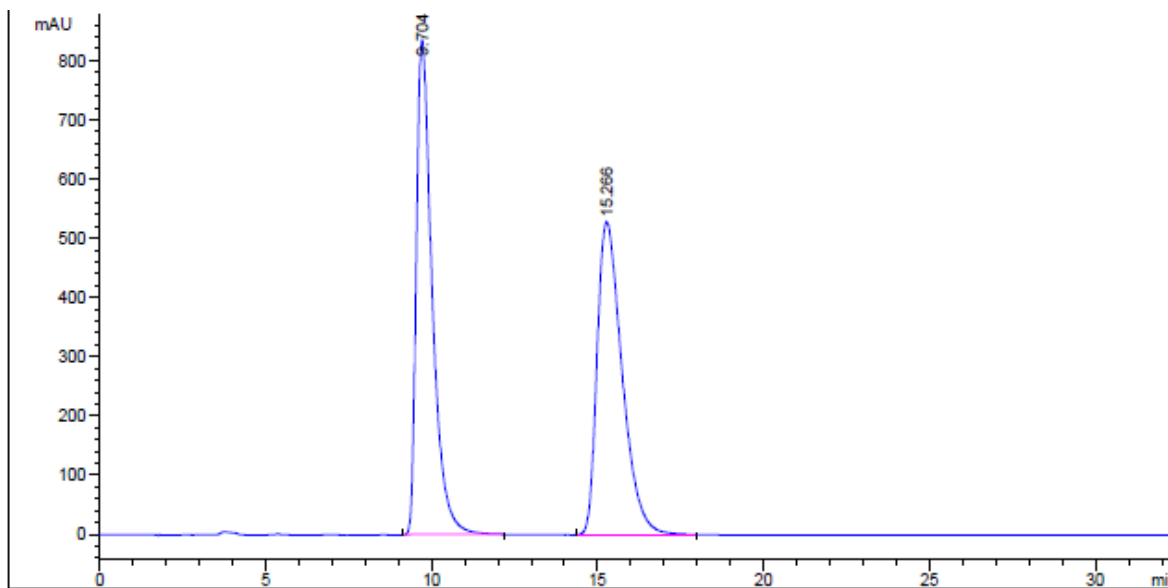

| Peak # | RetTime [min] | Type | Width [min] | Area mAU *s | Height [mAU] | Area %  |
|--------|---------------|------|-------------|-------------|--------------|---------|
| 1      | 9.704         | PB   | 0.4961      | 2.77391e4   | 836.45642    | 50.0940 |
| 2      | 15.266        | BB   | 0.7998      | 2.76350e4   | 528.08911    | 49.9060 |

Totals : 5.53741e4 1364.54553

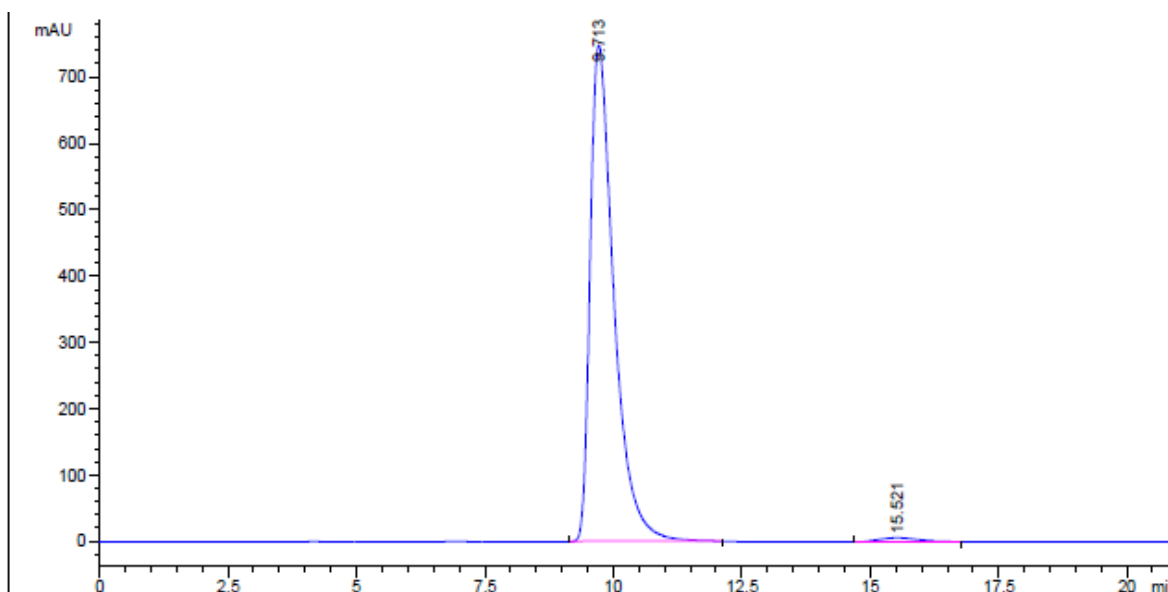

| Peak # | RetTime [min] | Type | Width [min] | Area mAU *s | Height [mAU] | Area %  |
|--------|---------------|------|-------------|-------------|--------------|---------|
| 1      | 9.713         | PB   | 0.4834      | 2.40865e4   | 748.06439    | 98.8792 |
| 2      | 15.521        | BB   | 0.6424      | 273.02325   | 5.69431      | 1.1208  |

Totals : 2.43596e4 753.75870



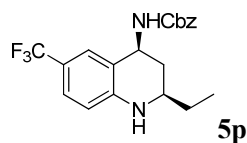

98% ee. [Daicel Chiralcel OJ-H, *n*-hexane / EtOH = 93 / 7, 1.0 mL/min,  $\lambda$  = 254 nm]

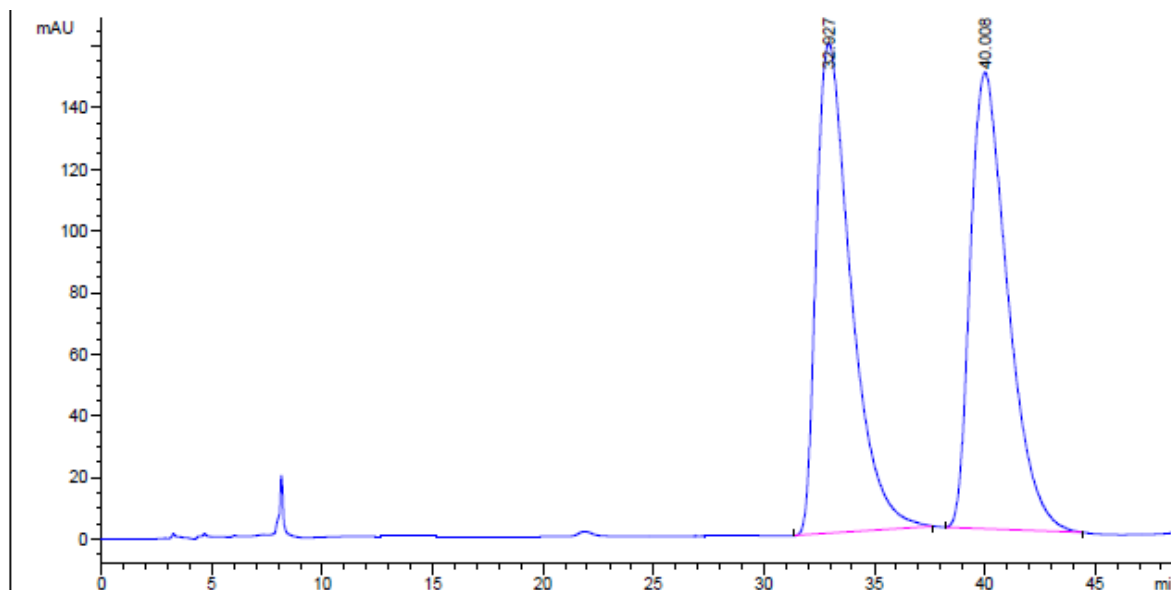

| Peak # | RetTime [min] | Type | Width [min] | Area mAU *s | Height [mAU] | Area %  |
|--------|---------------|------|-------------|-------------|--------------|---------|
| 1      | 32.927        | BB   | 1.6296      | 1.74106e4   | 159.21217    | 49.9936 |
| 2      | 40.008        | BB   | 1.7236      | 1.74150e4   | 148.33064    | 50.0064 |

Totals : 3.48256e4 307.54282

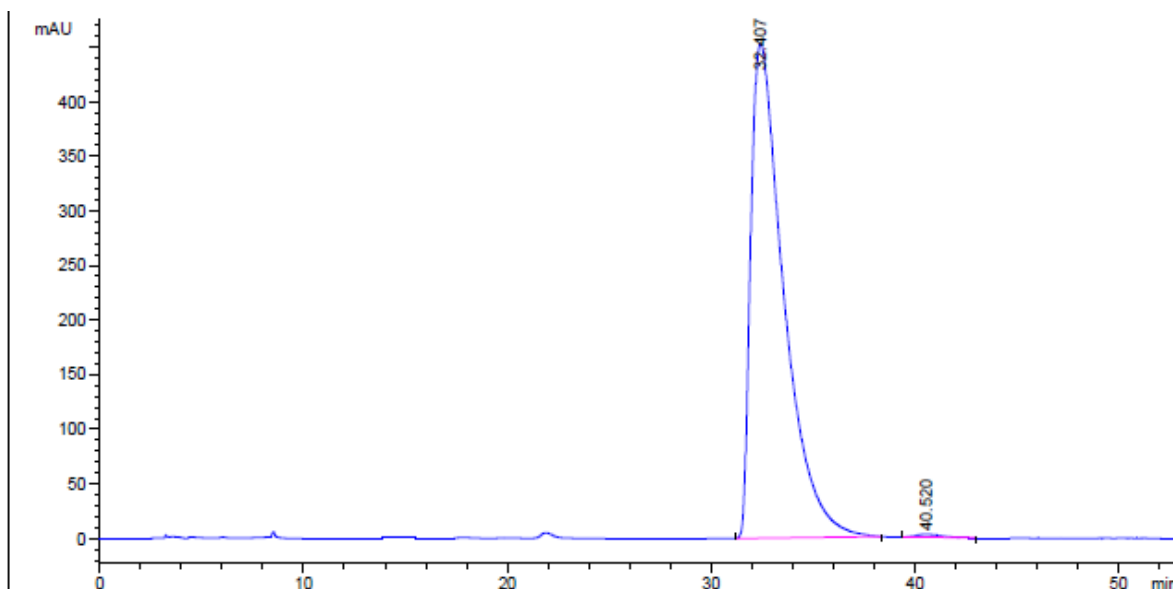

| Peak # | RetTime [min] | Type | Width [min] | Area mAU *s | Height [mAU] | Area %  |
|--------|---------------|------|-------------|-------------|--------------|---------|
| 1      | 32.407        | BB   | 1.6654      | 5.10238e4   | 452.84146    | 99.5183 |
| 2      | 40.520        | BP   | 1.1422      | 246.94986   | 2.54838      | 0.4817  |

Totals : 5.12707e4 455.38984

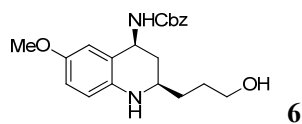

99% ee. [Daicel Chiralcel OJ-H, *n*-hexane / *i*-propanol = 60 / 40, 1.0 mL/min,  $\lambda$  = 254 nm]

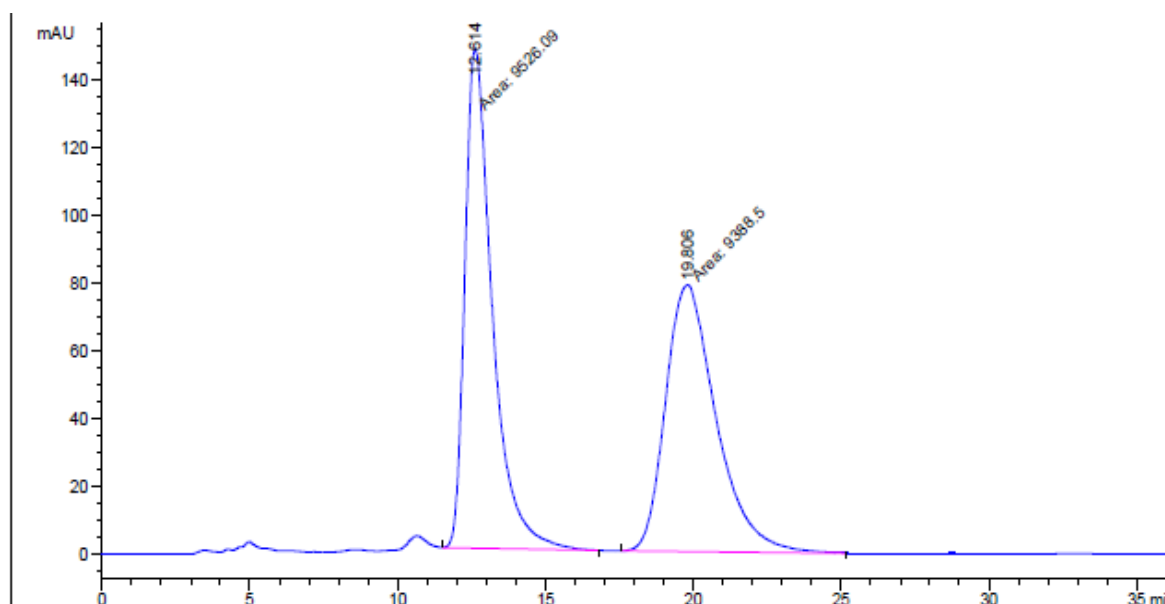

| Peak # | RetTime [min] | Type | Width [min] | Area mAU   | Area *s | Height [mAU] | Area %  |
|--------|---------------|------|-------------|------------|---------|--------------|---------|
| 1      | 12.614        | MM   | 1.0761      | 9526.09473 |         | 147.53679    | 50.3637 |
| 2      | 19.806        | MM   | 1.9853      | 9388.50488 |         | 78.81802     | 49.6363 |

Totals : 1.89146e4 226.35480

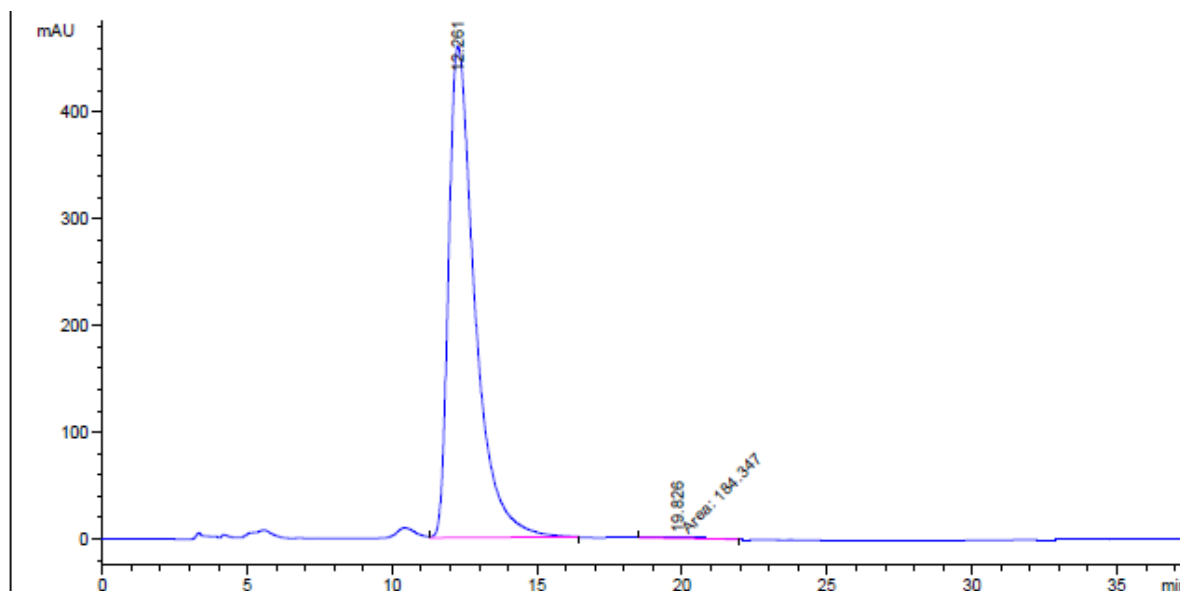

| Peak # | RetTime [min] | Type | Width [min] | Area mAU  | Area *s | Height [mAU] | Area %  |
|--------|---------------|------|-------------|-----------|---------|--------------|---------|
| 1      | 12.261        | VB   | 0.9487      | 2.90029e4 |         | 461.49316    | 99.3684 |
| 2      | 19.826        | MM   | 1.7810      | 184.34737 |         | 1.72510      | 0.6316  |

Totals : 2.91872e4 463.21826

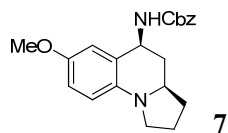

99% ee. [Daicel Chiralcel OJ-H, *n*-hexane / *i*-propanol = 90 / 10, 1.2 mL/min,  $\lambda$  = 254 nm]

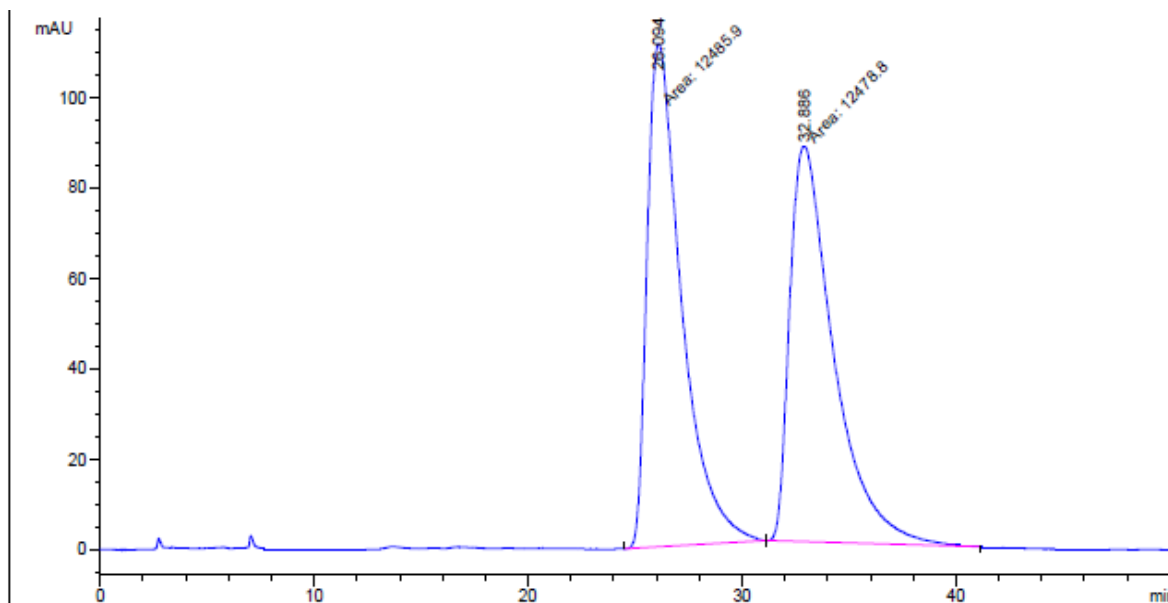

| Peak #   | RetTime [min] | Type | Width [min] | Area mAU *s | Height [mAU] | Area %  |
|----------|---------------|------|-------------|-------------|--------------|---------|
| 1        | 26.094        | MM   | 1.8707      | 1.24859e4   | 111.24030    | 50.0141 |
| 2        | 32.886        | MM   | 2.3783      | 1.24788e4   | 87.44910     | 49.9859 |
| Totals : |               |      |             | 2.49647e4   | 198.68939    |         |

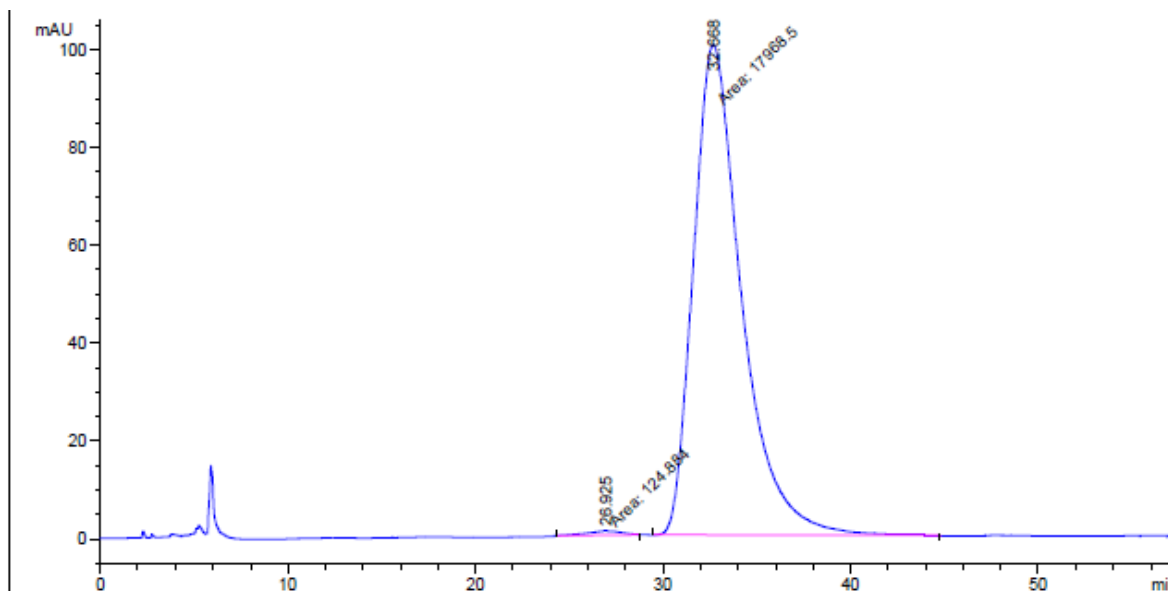

| Peak #   | RetTime [min] | Type | Width [min] | Area mAU *s | Height [mAU] | Area %  |
|----------|---------------|------|-------------|-------------|--------------|---------|
| 1        | 26.925        | MM   | 2.2802      | 124.88423   | 9.12814e-1   | 0.6902  |
| 2        | 32.668        | MM   | 2.9848      | 1.79685e4   | 100.33331    | 99.3098 |
| Totals : |               |      |             | 1.80933e4   | 101.24613    |         |
